# Supplementary material for: The Construction and Exploration of the CeRNA Network and Patterns of Tumor-infiltrating Immune Cells in Kidney Renal Clear Cell Carcinoma
Source: Research Square preprint supplement (doi:10.21203/rs.3.rs-113464/v2), 2021-09-22
Supplement: Supplementary file 2 [file 1796727fe007919479315a16.xlsx]

## Sheet: Sheet1
gene	immune	cor	corPval
SIX1	T cells follicular helper	-0.0370303	0.602657
SIX1	Mast cells resting	-0.0505318	0.477331
MALAT1	T cells follicular helper	0.231264	0.000984736
MALAT1	Mast cells resting	-0.273421	8.95e-05
hsa-miR-200b-3p	T cells follicular helper	0.00538049	0.939725
hsa-miR-200b-3p	Mast cells resting	-0.080107	0.25949
