# Supplementary material for: The Construction and Exploration of the CeRNA Network and Patterns of Tumor-infiltrating Immune Cells in Kidney Renal Clear Cell Carcinoma
Source: Research Square preprint supplement (doi:10.21203/rs.3.rs-113464/v2), 2021-09-22
Supplement: Supplementary file 3 [file 42ee3875e0085233f18f33cd.xlsx]

## Sheet: Sheet1
Genes	Counts	miRNAs
CCND2	7	hsa-miR-17-5p,hsa-miR-20a-5p,hsa-miR-519d-3p,hsa-miR-93-5p,hsa-miR-106b-5p,hsa-miR-20b-5p,hsa-miR-106a-5p
MYO9B	2	hsa-miR-133a-3p,hsa-miR-133b
RSRP1	3	hsa-miR-381-3p,hsa-miR-133a-3p,hsa-miR-133b
ADGRG2	3	hsa-miR-326,hsa-miR-21-5p,hsa-miR-330-5p
AHNAK2	2	hsa-miR-16-5p,hsa-miR-424-5p
RELT	2	hsa-miR-16-5p,hsa-miR-424-5p
APLN	2	hsa-miR-16-5p,hsa-miR-424-5p
SH2D2A	2	hsa-miR-16-5p,hsa-miR-424-5p
UNC5B	2	hsa-miR-16-5p,hsa-miR-424-5p
SLC41A2	2	hsa-miR-16-5p,hsa-miR-424-5p
OTOGL	2	hsa-miR-16-5p,hsa-miR-424-5p
AATK	2	hsa-miR-16-5p,hsa-miR-424-5p
RFLNB	2	hsa-miR-16-5p,hsa-miR-424-5p
LY6E	2	hsa-miR-16-5p,hsa-miR-424-5p
IRX3	2	hsa-miR-16-5p,hsa-miR-424-5p
KCNN4	2	hsa-miR-16-5p,hsa-miR-424-5p
CELSR3	8	hsa-miR-181b-5p,hsa-miR-181a-5p,hsa-miR-211-5p,hsa-miR-181c-5p,hsa-miR-4262,hsa-miR-124-3p,hsa-miR-204-5p,hsa-miR-506-3p
SIX1	8	hsa-miR-200b-3p,hsa-miR-200a-3p,hsa-miR-429,hsa-miR-200c-3p,hsa-miR-141-3p,hsa-miR-23a-3p,hsa-miR-590-3p,hsa-miR-23b-3p
TCF4	9	hsa-miR-29c-3p,hsa-miR-29b-3p,hsa-miR-4295,hsa-miR-130a-3p,hsa-miR-138-5p,hsa-miR-454-3p,hsa-miR-130b-3p,hsa-miR-3666,hsa-miR-29a-3p
WNK3	5	hsa-miR-4295,hsa-miR-130a-3p,hsa-miR-454-3p,hsa-miR-130b-3p,hsa-miR-3666
