# Supplementary material for: The Construction and Exploration of the CeRNA Network and Patterns of Tumor-infiltrating Immune Cells in Kidney Renal Clear Cell Carcinoma
Source: Research Square preprint supplement (doi:10.21203/rs.3.rs-113464/v2), 2021-09-22
Supplement: Supplementary file 7 [file 46b0f1ac0313a13fbe4a131b.xlsx]

## Sheet: Sheet1
row.names(deMI)	baseMean	logFC	lfcSE	stat	PValue	FDR
hsa-miR-210-3p	7886.06	3.03913	0.122209	24.8683	1.64038e-136	6.8732e-134
hsa-miR-122-5p	60.3687	6.47235	0.274242	23.6008	3.77959e-123	7.91825e-121
hsa-miR-155-5p	1532.09	3.497	0.153517	22.7792	7.37643e-115	1.03024e-112
hsa-miR-508-3p	117.757	-4.49079	0.203884	-22.0262	1.61412e-107	1.69079e-105
hsa-miR-21-5p	445894	2.17293	0.100839	21.5485	5.47215e-103	4.58566e-101
hsa-miR-514a-3p	92.0808	-4.50248	0.213874	-21.052	2.19265e-98	1.5312e-96
hsa-miR-532-3p	140.922	-2.18061	0.105692	-20.6317	1.42587e-94	8.53488e-93
hsa-miR-584-5p	122	2.11164	0.105713	19.9752	9.04853e-89	4.73917e-87
hsa-miR-2355-5p	160.656	1.5006	0.0759155	19.7667	5.76394e-87	2.68343e-85
hsa-miR-15a-5p	361.783	1.13571	0.0578981	19.6158	1.13438e-85	4.75305e-84
hsa-miR-509-3p	28.8455	-3.19297	0.168366	-18.9644	3.35547e-80	1.27813e-78
hsa-miR-106b-3p	394.754	1.32365	0.0712972	18.5653	6.13423e-77	2.14187e-75
hsa-miR-3613-5p	38.2817	1.71449	0.0939723	18.2446	2.28367e-74	7.36045e-73
hsa-miR-362-5p	55.7549	-2.81267	0.155004	-18.1459	1.3846e-73	4.14391e-72
hsa-miR-629-5p	174.746	1.47471	0.0817631	18.0364	1.00932e-72	2.81936e-71
hsa-miR-188-5p	5.99261	-2.08419	0.11826	-17.6237	1.61946e-69	4.24095e-68
hsa-miR-500a-3p	786.717	-1.64109	0.0972183	-16.8805	6.26628e-64	1.54445e-62
hsa-miR-224-5p	79.2889	2.73459	0.165608	16.5124	2.98823e-61	6.58983e-60
hsa-miR-592	62.8585	3.06308	0.186466	16.427	1.22632e-60	2.56914e-59
hsa-miR-129-5p	15.8685	-3.97774	0.24807	-16.0348	7.30428e-58	1.45738e-56
hsa-miR-16-5p	1740.75	1.02682	0.0649997	15.7973	3.24673e-56	6.18354e-55
hsa-miR-885-5p	42.218	3.64848	0.231175	15.7823	4.12014e-56	7.50583e-55
hsa-miR-452-5p	155.733	1.95356	0.127376	15.3369	4.33436e-53	7.56707e-52
hsa-miR-142-3p	7401.83	1.9733	0.129633	15.2223	2.51608e-52	4.21695e-51
hsa-miR-660-5p	115.804	-1.69627	0.114619	-14.7992	1.48307e-49	2.30151e-48
hsa-miR-15b-3p	44.6304	1.71014	0.116431	14.688	7.69114e-49	1.15092e-47
hsa-miR-429	95.8467	-1.89933	0.129746	-14.6388	1.58871e-48	2.29541e-47
hsa-miR-200b-5p	14.1092	-1.61891	0.110942	-14.5924	3.14138e-48	4.38746e-47
hsa-miR-363-3p	34.7259	-1.87821	0.130359	-14.408	4.6102e-47	6.03649e-46
hsa-miR-24-1-5p	43.7547	-1.13258	0.0794094	-14.2625	3.74852e-46	4.61949e-45
hsa-miR-1307-5p	877.985	1.55325	0.1089	14.2631	3.71368e-46	4.61949e-45
hsa-miR-125a-5p	2298.74	-1.06443	0.0767277	-13.8728	9.25276e-44	1.10769e-42
hsa-miR-501-3p	186.219	-1.42988	0.104322	-13.7064	9.29027e-43	1.08128e-41
hsa-miR-4772-3p	9.28976	2.03411	0.150736	13.4945	1.68514e-41	1.85809e-40
hsa-miR-181b-5p	766.274	1.21069	0.090737	13.3428	1.30403e-40	1.40099e-39
hsa-miR-200a-5p	447.484	-1.49246	0.111978	-13.3281	1.58811e-40	1.66354e-39
hsa-miR-93-5p	6751.38	1.02417	0.0772413	13.2593	3.98445e-40	4.07191e-39
hsa-miR-142-5p	150.317	1.64619	0.124548	13.2173	6.97436e-40	6.95775e-39
hsa-miR-188-3p	5.7861	-2.02045	0.15391	-13.1275	2.29197e-39	2.23334e-38
hsa-miR-21-3p	3232.29	1.45127	0.111486	13.0176	9.72285e-39	9.2588e-38
hsa-miR-342-5p	23.8578	1.19209	0.0924461	12.895	4.80443e-38	4.47346e-37
hsa-miR-200b-3p	588.621	-1.60308	0.124843	-12.8408	9.68135e-38	8.81845e-37
hsa-let-7g-5p	1560.6	-1.01085	0.079496	-12.7157	4.83895e-37	4.31387e-36
hsa-miR-501-5p	8.96819	-1.32616	0.104692	-12.6673	8.97932e-37	7.67824e-36
hsa-let-7e-5p	3202.91	-1.24553	0.0995045	-12.5174	5.99958e-36	4.92906e-35
hsa-let-7e-3p	36.4165	-1.02152	0.0817715	-12.4923	8.22252e-36	6.62545e-35
hsa-miR-452-3p	12.7727	1.9031	0.152548	12.4754	1.01746e-35	8.04365e-35
hsa-miR-30c-2-3p	521.859	-1.44837	0.116267	-12.4573	1.2759e-35	9.90002e-35
hsa-miR-532-5p	2311.8	-1.29493	0.10413	-12.4358	1.67083e-35	1.27287e-34
hsa-miR-500b-5p	15.4814	-1.34958	0.10873	-12.4122	2.24283e-35	1.67811e-34
hsa-miR-500a-5p	15.4947	-1.34887	0.108739	-12.4047	2.46439e-35	1.81154e-34
hsa-miR-125b-5p	1308.8	-1.16228	0.0941435	-12.3458	5.13199e-35	3.70742e-34
hsa-miR-4677-3p	16.7008	1.06606	0.0868021	12.2815	1.13811e-34	8.08248e-34
hsa-miR-345-5p	23.88	-1.10612	0.0908398	-12.1766	4.14085e-34	2.8917e-33
hsa-miR-342-3p	338.043	1.07112	0.0885713	12.0933	1.14635e-33	7.8741e-33
hsa-miR-181b-3p	53.1887	1.10944	0.0938633	11.8198	3.08527e-32	2.05195e-31
hsa-miR-200a-3p	322.161	-1.35762	0.11603	-11.7005	1.26658e-31	8.16454e-31
hsa-miR-590-3p	15.2432	1.16786	0.100594	11.6097	3.68069e-31	2.33668e-30
hsa-miR-210-5p	3.98716	2.41259	0.20872	11.559	6.65032e-31	4.15893e-30
hsa-miR-502-3p	33.5751	-1.08904	0.0955638	-11.396	4.37806e-30	2.65856e-29
hsa-miR-16-2-3p	17.4189	1.40274	0.12404	11.3087	1.18772e-29	7.10938e-29
hsa-miR-16-1-3p	8.74791	1.13886	0.102357	11.1264	9.33032e-29	5.42973e-28
hsa-miR-149-5p	29.673	-1.64917	0.148207	-11.1275	9.22107e-29	5.42973e-28
hsa-miR-203a-3p	1550.64	-1.92921	0.174175	-11.0762	1.63587e-28	9.38944e-28
hsa-miR-1270	44.7455	1.72056	0.156754	10.9762	4.97438e-28	2.74246e-27
hsa-miR-6509-5p	3.94727	2.22085	0.20465	10.852	1.95163e-27	1.06199e-26
hsa-miR-200c-3p	1069.55	-3.18527	0.294647	-10.8105	3.07114e-27	1.64975e-26
hsa-miR-30a-3p	102968	-1.03557	0.0959047	-10.7979	3.51991e-27	1.86689e-26
hsa-miR-199a-5p	859.036	-1.53947	0.143272	-10.7451	6.25085e-27	3.27388e-26
hsa-miR-335-5p	16.7608	-1.6686	0.158959	-10.497	8.913e-26	4.55433e-25
hsa-miR-30b-3p	12.3524	-1.49699	0.142852	-10.4793	1.07519e-25	5.42777e-25
hsa-miR-30b-5p	1682.27	-1.09434	0.105942	-10.3296	5.1773e-25	2.5521e-24
hsa-miR-214-3p	6.01364	-1.63223	0.162336	-10.0547	8.76273e-24	4.17225e-23
hsa-miR-1-3p	35.3979	-1.72697	0.171914	-10.0456	9.60896e-24	4.52377e-23
hsa-miR-144-5p	955.705	1.84135	0.184653	9.97194	2.02246e-23	9.41569e-23
hsa-miR-625-3p	245.842	1.07222	0.110349	9.71659	2.56222e-22	1.15438e-21
hsa-miR-1271-5p	25.379	1.28358	0.133288	9.63012	5.9659e-22	2.63128e-21
hsa-miR-3615	3.89846	2.0407	0.212585	9.59946	8.03627e-22	3.5075e-21
hsa-miR-144-3p	59.4456	1.83938	0.192396	9.56038	1.1733e-21	5.06816e-21
hsa-miR-3130-5p	10.5019	1.42454	0.149314	9.54057	1.42054e-21	6.07353e-21
hsa-miR-629-3p	12.0433	1.17179	0.126483	9.26439	1.96196e-20	7.98116e-20
hsa-miR-2355-3p	8.80619	1.30075	0.140995	9.22548	2.82282e-20	1.13727e-19
hsa-miR-199a-3p	2406.97	-1.21709	0.13254	-9.18278	4.2011e-20	1.67644e-19
hsa-miR-199b-3p	2400.96	-1.21738	0.132649	-9.17748	4.41287e-20	1.74433e-19
hsa-miR-146a-5p	229.078	1.09959	0.121008	9.08689	1.01914e-19	3.99086e-19
hsa-miR-616-5p	10.7693	1.33597	0.147123	9.08058	1.08002e-19	4.19009e-19
hsa-miR-10a-5p	101229	-1.19959	0.132791	-9.03363	1.66062e-19	6.32546e-19
hsa-miR-146b-5p	1645.43	1.49121	0.165786	8.99477	2.36733e-19	8.93615e-19
hsa-miR-20b-5p	72.0539	-1.20722	0.138223	-8.73382	2.46211e-18	9.12943e-18
hsa-miR-5586-5p	7.29705	1.42205	0.163857	8.6786	4.00664e-18	1.47262e-17
hsa-miR-204-5p	1072.34	-1.63926	0.188986	-8.67396	4.17331e-18	1.52054e-17
hsa-miR-10a-3p	6.99742	-1.20071	0.139937	-8.58037	9.45648e-18	3.32963e-17
hsa-miR-215-5p	196.973	1.60793	0.187653	8.56865	1.04707e-17	3.65601e-17
hsa-miR-130b-3p	13.5793	1.03778	0.122516	8.47052	2.44293e-17	8.32186e-17
hsa-miR-1251-5p	24.0742	-2.30386	0.278088	-8.28464	1.18462e-16	3.90831e-16
hsa-miR-136-5p	30.0779	-1.28261	0.155994	-8.22219	1.99824e-16	6.54113e-16
hsa-miR-203b-3p	17.0515	-2.53611	0.310986	-8.15506	3.49013e-16	1.11631e-15
hsa-miR-214-5p	15.2532	-1.21105	0.148761	-8.14089	3.92382e-16	1.24551e-15
hsa-miR-2277-5p	3.23312	1.49772	0.186437	8.03338	9.48243e-16	2.92142e-15
hsa-miR-550a-3p	4.64506	1.28516	0.163253	7.87222	3.48404e-15	1.04272e-14
hsa-miR-141-3p	161.76	-2.61475	0.339236	-7.70776	1.28046e-14	3.75182e-14
hsa-miR-136-3p	5.94731	-1.23316	0.163225	-7.555	4.18857e-14	1.20206e-13
hsa-miR-451a	2925.64	1.43994	0.191254	7.52895	5.1149e-14	1.45792e-13
hsa-miR-153-5p	24.153	1.23449	0.164295	7.51387	5.74025e-14	1.62511e-13
hsa-miR-33a-5p	26.8324	-1.23688	0.167457	-7.38624	1.51044e-13	4.16365e-13
hsa-miR-3065-3p	70.6798	-1.42643	0.199011	-7.16757	7.63415e-13	2.03739e-12
hsa-miR-154-5p	4.78681	-1.44548	0.202909	-7.12378	1.05007e-12	2.76717e-12
hsa-miR-503-3p	10.1006	1.07808	0.151616	7.1106	1.15536e-12	3.02559e-12
hsa-miR-127-5p	199.461	-1.00711	0.14242	-7.07141	1.53367e-12	3.99135e-12
hsa-miR-493-5p	7.84576	-1.17629	0.166469	-7.06611	1.59341e-12	4.12122e-12
hsa-miR-127-3p	344.522	-1.11976	0.158895	-7.04716	1.82611e-12	4.6941e-12
hsa-miR-224-3p	9.11908	1.04695	0.151178	6.92528	4.35101e-12	1.09824e-11
hsa-miR-33b-5p	6.20815	1.35697	0.197306	6.8775	6.09118e-12	1.51917e-11
hsa-miR-146b-3p	193.934	1.06822	0.156024	6.84649	7.56854e-12	1.86542e-11
hsa-miR-653-5p	304.996	1.32522	0.200351	6.61448	3.72853e-11	9.08287e-11
hsa-miR-323b-3p	7.16805	-1.453	0.219847	-6.60914	3.86556e-11	9.36225e-11
hsa-miR-133a-3p	18.551	-1.11169	0.16973	-6.54972	5.76453e-11	1.38813e-10
hsa-miR-135a-5p	45.377	-1.56295	0.241532	-6.471	9.73578e-11	2.30468e-10
hsa-miR-199b-5p	26.3945	-1.54138	0.245765	-6.27178	3.56944e-10	8.21756e-10
hsa-miR-204-3p	11.0656	-1.09575	0.177709	-6.16601	7.00329e-10	1.57762e-09
hsa-miR-217	152.793	-1.477	0.240773	-6.13443	8.54668e-10	1.91501e-09
hsa-miR-486-5p	630.378	1.11851	0.183565	6.09323	1.10652e-09	2.44018e-09
hsa-miR-675-3p	166.603	-1.58854	0.274232	-5.79268	6.92701e-09	1.41581e-08
hsa-miR-874-3p	63.9123	-1.12024	0.19549	-5.73045	1.00163e-08	2.01771e-08
hsa-miR-141-5p	70.2595	-2.12443	0.381455	-5.56928	2.55797e-08	5.07958e-08
hsa-miR-3065-5p	6.56016	-1.26194	0.228675	-5.51848	3.41937e-08	6.7581e-08
hsa-miR-5683	5.38132	1.02918	0.21864	4.70719	2.5116e-06	4.38483e-06
hsa-miR-1269a	630.836	1.97948	0.446601	4.43232	9.32241e-06	1.57504e-05
hsa-miR-653-3p	7.67714	1.0429	0.240164	4.34243	1.40914e-05	2.3523e-05
hsa-miR-3653-5p	32.0264	1.0357	0.246308	4.20491	2.61192e-05	4.25834e-05
hsa-miR-187-3p	50.9396	-1.29062	0.308694	-4.18091	2.90342e-05	4.67898e-05
hsa-miR-31-5p	25.863	-1.05802	0.275671	-3.83798	0.000124048	0.000186965
FUT11	protein_coding	3554.27	1.55052	0.0684212	22.6614	1.07639e-113
ALDH6A1	protein_coding	6907.95	-3.06775	0.13561	-22.6219	2.64039e-113
SLC20A2	protein_coding	2129.5	-1.39757	0.0619584	-22.5566	1.15775e-112
LPCAT1	protein_coding	14543.5	2.54835	0.11306	22.5397	1.69372e-112
CAV2	protein_coding	9081.31	1.99873	0.0887061	22.5321	2.01221e-112
KLHL14	protein_coding	262.952	-3.86565	0.171909	-22.4867	5.60567e-112
MYO1F	protein_coding	2086.11	2.50288	0.111415	22.4645	9.23727e-112
PTPRE	protein_coding	2222.85	1.65635	0.0737935	22.4457	1.4081e-111
TRPM2	protein_coding	838.356	2.7559	0.122816	22.4392	1.63326e-111
IL20RB	protein_coding	1419.22	6.59732	0.294913	22.3704	7.65294e-111
SLFN13	protein_coding	2422.94	2.15087	0.0962013	22.3581	1.00766e-110
PIP4K2C	protein_coding	2863.07	-1.41391	0.0634616	-22.2798	5.79913e-110
PLK2	protein_coding	6275.09	2.21639	0.0994931	22.2768	6.20039e-110
SCD	protein_coding	25597.1	3.00923	0.135233	22.2522	1.07288e-109
ANGPT2	protein_coding	6780.8	3.11108	0.13992	22.2348	1.58379e-109
VASH1	protein_coding	3070.99	2.16328	0.0974253	22.2045	3.10467e-109
DLX5	protein_coding	146.712	3.4404	0.154981	22.1989	3.52201e-109
TYROBP	protein_coding	4690.81	2.67093	0.120358	22.1916	4.13943e-109
EHD2	protein_coding	18965.1	2.25404	0.101622	22.1805	5.29309e-109
LAPTM5	protein_coding	17653.3	2.54132	0.114862	22.125	1.81654e-108
DNAH11	protein_coding	2067.33	4.52327	0.204491	22.1197	2.04437e-108
FAM171A1	protein_coding	2471.68	-2.17454	0.0983196	-22.1171	2.16413e-108
TAPBP	protein_coding	22931.7	1.60808	0.0727227	22.1125	2.39419e-108
TMEM164	protein_coding	1873.89	-1.50145	0.0679795	-22.0868	4.22946e-108
RELT	protein_coding	469.837	2.08415	0.0943829	22.0819	4.71906e-108
IGSF6	protein_coding	1146.25	2.66262	0.120594	22.0792	5.01256e-108
ARRB2	protein_coding	3406.52	1.50818	0.0683494	22.0658	6.73971e-108
PSORS1C1	protein_coding	362.314	2.96673	0.134479	22.0609	7.50509e-108
CARMIL1	protein_coding	1590.47	-1.49357	0.0677103	-22.0583	7.95775e-108
CNP	protein_coding	5694.1	-1.30337	0.0591191	-22.0466	1.03057e-107
PIK3R6	protein_coding	267.461	3.38561	0.15374	22.0216	1.78659e-107
PFKFB4	protein_coding	1631.32	2.4196	0.110081	21.9802	4.45976e-107
LGALS9	protein_coding	2928.78	2.19606	0.100002	21.9602	6.9207e-107
STAC3	protein_coding	241.006	2.28695	0.10424	21.9392	1.09834e-106
SRGAP3	protein_coding	485.968	-2.49924	0.114037	-21.916	1.82663e-106
MYO3A	protein_coding	603.833	3.27482	0.149546	21.8984	2.68821e-106
ARHGAP25	protein_coding	1810.08	1.75613	0.0802172	21.8922	3.08003e-106
PDK1	protein_coding	3858.81	1.88733	0.0864388	21.8343	1.09609e-105
PML	protein_coding	6584.18	1.21806	0.055801	21.8286	1.24183e-105
PSMB9	protein_coding	4037.99	2.22848	0.102173	21.8109	1.82934e-105
NLRC5	protein_coding	3107.84	2.23024	0.10237	21.786	3.14838e-105
LAIR1	protein_coding	2375.6	2.63929	0.121181	21.7797	3.61118e-105
CSPG4	protein_coding	8384.34	2.7293	0.125402	21.7644	5.04994e-105
POU5F1	protein_coding	1816.9	3.39349	0.155933	21.7624	5.26745e-105
WNK1	protein_coding	12342.3	-1.54911	0.0713772	-21.7032	1.91243e-104
NHLRC4	protein_coding	172.673	-3.20646	0.147828	-21.6906	2.5186e-104
PLPPR5	protein_coding	394.465	6.40203	0.295273	21.6818	3.04994e-104
PRELID2	protein_coding	479.248	2.00267	0.0924697	21.6576	5.15167e-104
CES4A	protein_coding	1794.44	4.15252	0.191775	21.653	5.69052e-104
TNFRSF14	protein_coding	7627.73	2.13791	0.0989244	21.6115	1.40018e-103
DPEP2	protein_coding	329.125	2.27585	0.10536	21.6008	1.76543e-103
SIGLEC10	protein_coding	897.213	2.97416	0.13783	21.5784	2.86533e-103
PALD1	protein_coding	1944.98	1.95196	0.090489	21.5713	3.34324e-103
LGI2	protein_coding	498.496	-3.28695	0.152385	-21.5701	3.43106e-103
TNFSF9	protein_coding	537.032	3.4813	0.161449	21.5628	4.01242e-103
SFXN2	protein_coding	1285.85	-2.3885	0.110804	-21.5561	4.63943e-103
ADAMTS7	protein_coding	758.468	2.44344	0.113379	21.5511	5.16515e-103
VSIG1	protein_coding	222.672	3.95247	0.183487	21.5409	6.44469e-103
CADPS2	protein_coding	2688.75	-1.62059	0.075242	-21.5383	6.80987e-103
SLC37A2	protein_coding	1078.98	2.72358	0.126477	21.5341	7.46344e-103
TMEM45B	protein_coding	572.133	-3.94449	0.183563	-21.4885	1.99657e-102
CD68	protein_coding	233.103	3.18114	0.148136	21.4745	2.69864e-102
NUSAP1	protein_coding	1086.5	2.13377	0.0993814	21.4705	2.93676e-102
RNASET2	protein_coding	13735.4	3.36007	0.156557	21.4624	3.50131e-102
TRADD	protein_coding	2274.47	1.45533	0.0678522	21.4485	4.71474e-102
PRKAR2B	protein_coding	561.073	-2.25333	0.105072	-21.4456	5.01728e-102
LILRB4	protein_coding	1312.27	3.12171	0.145611	21.4387	5.81607e-102
TCF21	protein_coding	540.132	-3.53503	0.164929	-21.4336	6.49605e-102
DCAF11	protein_coding	4505.91	-1.14709	0.0535869	-21.4062	1.16979e-101
TMCC1	protein_coding	5674.92	1.78332	0.0833158	21.4043	1.21866e-101
SFRP1	protein_coding	3974.46	-5.27503	0.24662	-21.3893	1.67999e-101
ADAP2	protein_coding	1423.5	1.82475	0.0854047	21.3659	2.7771e-101
CYFIP2	protein_coding	16324.1	-2.27471	0.106466	-21.3656	2.7948e-101
PFKP	protein_coding	28117.9	1.96259	0.0918803	21.3603	3.12896e-101
VWF	protein_coding	61993.2	3.00592	0.140851	21.3411	4.71735e-101
PSMB8	protein_coding	7889.43	1.63522	0.0766282	21.3397	4.85691e-101
HS3ST2	protein_coding	353.082	4.89571	0.229438	21.3379	5.05597e-101
AK3	protein_coding	4763.86	-1.47938	0.0693421	-21.3345	5.43648e-101
DNAJC11	protein_coding	2221.71	-1.32801	0.0623357	-21.3042	1.03801e-100
OPHN1	protein_coding	624.981	-1.72523	0.0809868	-21.3026	1.07391e-100
PAQR7	protein_coding	1934.25	-1.59975	0.0751308	-21.2929	1.32136e-100
RASD2	protein_coding	820.354	2.89389	0.136007	21.2775	1.836e-100
HADH	protein_coding	3645.85	-1.77878	0.0836657	-21.2606	2.63181e-100
ARHGDIB	protein_coding	14499.3	1.66535	0.0783644	21.2514	3.20054e-100
FCER1G	protein_coding	2726.93	2.54514	0.11981	21.2432	3.81158e-100
EPM2A	protein_coding	523.249	-1.4063	0.0662219	-21.2361	4.42862e-100
TNFRSF10B	protein_coding	5766.66	1.50378	0.0708214	21.2334	4.68936e-100
CACNA2D2	protein_coding	181.503	-2.29997	0.108482	-21.2013	9.28787e-100
NKG7	protein_coding	1652	3.49691	0.165059	21.1859	1.28932e-99
RNF149	protein_coding	5312.26	1.31182	0.061993	21.1607	2.19787e-99
RGS19	protein_coding	878.911	1.72682	0.081674	21.1428	3.21245e-99
FAM111B	protein_coding	239.089	2.51308	0.118897	21.1365	3.66943e-99
EPB41L5	protein_coding	2332.76	-1.79023	0.0847135	-21.1327	3.98046e-99
CDK18	protein_coding	17423.1	2.36816	0.11208	21.1293	4.27849e-99
PKMYT1	protein_coding	140.421	2.95506	0.140011	21.1059	7.02441e-99
CLIC5	protein_coding	2247.95	-3.82701	0.181334	-21.1048	7.19177e-99
LDHA	protein_coding	95625.8	1.68307	0.0799923	21.0404	2.79784e-98
BTN3A1	protein_coding	4507.74	1.85745	0.088293	21.0374	2.98304e-98
USP46	protein_coding	1046.5	-1.333	0.0633796	-21.032	3.34261e-98
NUDT4	protein_coding	3147.19	-1.81636	0.0863741	-21.029	3.56238e-98
LAT2	protein_coding	933.22	2.15118	0.102352	21.0175	4.5352e-98
FAM153C	protein_coding	237.595	5.21669	0.248265	21.0126	5.03541e-98
OSCAR	protein_coding	282.889	2.59084	0.123336	21.0063	5.74059e-98
C1QB	protein_coding	14988.6	2.9301	0.139644	20.9827	9.44522e-98
HLA-A	protein_coding	122999	1.70435	0.0812371	20.9799	1.00123e-97
FCGR1A	protein_coding	483.773	3.10295	0.147934	20.9753	1.10336e-97
CLEC2D	protein_coding	858.566	2.53342	0.120828	20.9671	1.30955e-97
ACAA1	protein_coding	3559.32	-1.62208	0.0774031	-20.9562	1.64568e-97
FMNL1	protein_coding	1972.14	2.24432	0.107161	20.9434	2.15593e-97
LILRB2	protein_coding	832.733	2.28825	0.109267	20.9419	2.22509e-97
PYGL	protein_coding	4095.21	2.00991	0.0961136	20.9118	4.18191e-97
PTPN13	protein_coding	3354.81	-1.87542	0.0897191	-20.9033	4.99847e-97
GNLY	protein_coding	694.285	3.12932	0.149732	20.8995	5.40943e-97
PRMT6	protein_coding	1043.73	-1.29556	0.0620133	-20.8916	6.38421e-97
C1QTNF6	protein_coding	1278.23	2.29324	0.10991	20.8648	1.11787e-96
IL4R	protein_coding	4294.96	1.46684	0.070324	20.8583	1.28149e-96
LTB4R	protein_coding	710.645	2.53806	0.121688	20.857	1.31556e-96
PLA2G7	protein_coding	499.309	3.65905	0.175492	20.8502	1.51822e-96
PTPRN	protein_coding	347.262	5.35331	0.256812	20.8452	1.68521e-96
MS4A14	protein_coding	229.611	3.19858	0.153467	20.8421	1.79605e-96
SPI1	protein_coding	1836.95	2.36732	0.113622	20.8351	2.07966e-96
IKBIP	protein_coding	3118.2	1.82385	0.0876598	20.806	3.82233e-96
PROX1	protein_coding	549.134	-4.35796	0.209527	-20.7991	4.41433e-96
TBXAS1	protein_coding	1678.97	1.79463	0.086407	20.7695	8.16342e-96
OLFML2A	protein_coding	8689.33	2.67872	0.128989	20.7671	8.58635e-96
SASH3	protein_coding	1418.6	2.47709	0.11935	20.7549	1.10693e-95
IL12RB1	protein_coding	386.754	2.59126	0.124959	20.7369	1.60894e-95
CAV1	protein_coding	14772.3	2.2336	0.107814	20.7171	2.42649e-95
KLHL6	protein_coding	743.894	2.58945	0.125027	20.7112	2.74704e-95
EFHD1	protein_coding	4585.21	-2.62628	0.127069	-20.6681	6.70633e-95
KLRD1	protein_coding	386.864	2.29145	0.110911	20.6602	7.90334e-95
ABAT	protein_coding	2746.49	-3.05951	0.148122	-20.6554	8.72644e-95
HLX	protein_coding	1314.38	2.55172	0.12354	20.655	8.79628e-95
APOBEC3G	protein_coding	1624.75	2.33017	0.112828	20.6525	9.27757e-95
CCND1	protein_coding	45420.5	2.28763	0.110791	20.6482	1.01308e-94
CSF3R	protein_coding	1090.96	2.74583	0.133217	20.6117	2.1565e-94
SLC16A5	protein_coding	873.513	-3.0523	0.1482	-20.5958	2.99322e-94
CDC45	protein_coding	146.955	2.72991	0.132548	20.5956	3.00482e-94
ELMO1	protein_coding	2571.54	1.78808	0.0868957	20.5773	4.38291e-94
C3	protein_coding	103266	3.73682	0.181871	20.5466	8.25959e-94
P2RY1	protein_coding	840.749	2.40574	0.117184	20.5296	1.17102e-93
ETV7	protein_coding	519.117	2.68007	0.130663	20.5114	1.70396e-93
RUNX3	protein_coding	1392.98	2.68189	0.130845	20.4967	2.30565e-93
PDLIM1	protein_coding	10733.4	1.67908	0.0819231	20.4958	2.34616e-93
PPP1R18	protein_coding	4744.6	1.66571	0.0813048	20.4872	2.79854e-93
DISC1	protein_coding	694.952	1.62521	0.0793309	20.4864	2.84435e-93
LY86	protein_coding	709.677	2.4835	0.121284	20.4766	3.47848e-93
TRIM9	protein_coding	931.485	2.84261	0.138898	20.4655	4.37296e-93
HCLS1	protein_coding	4465.23	1.90168	0.0929233	20.4651	4.40969e-93
KCNK9	protein_coding	252.076	4.55522	0.223003	20.4267	9.67558e-93
ATP8B3	protein_coding	644.921	4.2412	0.20767	20.4228	1.04968e-92
GPSM3	protein_coding	1850.24	1.94071	0.0951076	20.4054	1.49617e-92
GOLGA7B	protein_coding	280.736	3.866	0.189476	20.4037	1.55166e-92
KCNK13	protein_coding	196.246	-2.63741	0.129285	-20.4	1.67062e-92
CCDC88B	protein_coding	1004.85	2.5884	0.126963	20.387	2.18138e-92
C1orf162	protein_coding	1739.91	2.34509	0.115076	20.3785	2.59327e-92
MECOM	protein_coding	3642.74	-2.59953	0.127591	-20.374	2.84517e-92
C4orf47	protein_coding	377.372	2.51882	0.123664	20.3682	3.19911e-92
C1QC	protein_coding	12166.5	2.75521	0.135279	20.3668	3.2936e-92
TRPA1	protein_coding	375.758	3.73103	0.183353	20.3489	4.74703e-92
EZH2	protein_coding	435.057	1.84961	0.0909027	20.3472	4.92063e-92
RGS1	protein_coding	6804.09	3.08165	0.151464	20.3457	5.07054e-92
RASSF2	protein_coding	3017.16	2.17767	0.107054	20.3417	5.50015e-92
BTN3A2	protein_coding	6936.27	1.98797	0.0978282	20.321	8.38657e-92
PNP	protein_coding	4648.13	-1.47464	0.0726311	-20.3032	1.20515e-91
FAM163A	protein_coding	84.6826	3.2237	0.158948	20.2814	1.87535e-91
FOXC1	protein_coding	1498	-2.17979	0.107489	-20.2792	1.96107e-91
ISG20	protein_coding	839.033	2.36529	0.116693	20.2693	2.39896e-91
PRF1	protein_coding	1413.3	2.63643	0.130141	20.2583	3.00415e-91
PTPN4	protein_coding	1504.23	-1.30748	0.0645662	-20.2502	3.54059e-91
APOBEC3H	protein_coding	105.407	2.91728	0.144254	20.2232	6.12411e-91
SEMA6D	protein_coding	1107.88	-2.95322	0.146032	-20.2231	6.13553e-91
PRDM16	protein_coding	486.833	-3.73893	0.184921	-20.2191	6.655e-91
BTBD16	protein_coding	196.783	3.58092	0.177194	20.2091	8.14322e-91
ITGB2	protein_coding	8626.5	2.38948	0.118276	20.2025	9.3008e-91
LZTS1	protein_coding	2470	2.38841	0.118367	20.1781	1.52429e-90
CPAMD8	protein_coding	850.145	-2.79523	0.138527	-20.1782	1.52215e-90
CASP1	protein_coding	1649.24	1.7315	0.0858145	20.1772	1.55321e-90
TMSB10	protein_coding	70055.5	2.1462	0.106415	20.1682	1.86186e-90
P4HA1	protein_coding	8812.38	1.69169	0.0839049	20.162	2.11378e-90
PTPRO	protein_coding	1155.76	-3.21666	0.159605	-20.1539	2.48495e-90
PADI1	protein_coding	508.642	5.71824	0.284088	20.1284	4.16283e-90
GMFG	protein_coding	1980.95	1.85547	0.0922414	20.1154	5.40815e-90
LOX	protein_coding	18846.1	4.05139	0.201564	20.0997	7.41926e-90
FCGR1B	protein_coding	89.5068	2.85404	0.142026	20.0952	8.12821e-90
MS4A7	protein_coding	3397.52	2.38212	0.118565	20.0913	8.79507e-90
NFAM1	protein_coding	892.239	2.11402	0.105235	20.0886	9.28438e-90
ABHD17C	protein_coding	669.017	-2.05305	0.102221	-20.0844	1.01097e-89
ARHGAP9	protein_coding	794.736	2.55434	0.127185	20.0837	1.02436e-89
CD247	protein_coding	642.574	2.58186	0.128632	20.0716	1.30696e-89
N4BP2L1	protein_coding	1317.6	1.32736	0.0661432	20.0679	1.4076e-89
GZMH	protein_coding	396.426	2.99569	0.149487	20.0398	2.47778e-89
MCHR1	protein_coding	704.598	5.73324	0.286169	20.0345	2.75723e-89
OLFML2B	protein_coding	3707.31	2.6915	0.134416	20.0236	3.42969e-89
RFC2	protein_coding	1556.12	1.10881	0.0553763	20.0232	3.45955e-89
PPP1R3G	protein_coding	522.036	2.13914	0.106898	20.011	4.41342e-89
PLCL1	protein_coding	1983.68	-2.65751	0.132952	-19.9885	6.93142e-89
ANXA4	protein_coding	41531.2	1.84665	0.0924838	19.9673	1.06049e-88
CCL18	protein_coding	906.065	5.6954	0.285265	19.9653	1.1033e-88
FGD2	protein_coding	811.505	2.4808	0.124287	19.9602	1.22118e-88
SIGLEC9	protein_coding	284.861	2.30462	0.115492	19.9548	1.36217e-88
TMC8	protein_coding	1082.4	2.52607	0.126751	19.9293	2.26685e-88
BIN2	protein_coding	951.784	2.01088	0.10095	19.9196	2.75175e-88
FASLG	protein_coding	156.048	3.48661	0.175249	19.8952	4.4764e-88
YPEL4	protein_coding	139.786	2.65446	0.13344	19.8925	4.7214e-88
LILRB3	protein_coding	208.466	2.46564	0.123972	19.8886	5.10392e-88
UHRF1	protein_coding	266.32	2.76848	0.139338	19.8688	7.58439e-88
FAM219A	protein_coding	2047.52	1.06759	0.0537724	19.8539	1.02034e-87
TROAP	protein_coding	178.972	3.26442	0.164433	19.8526	1.0464e-87
ACADSB	protein_coding	3995.16	-2.03438	0.102486	-19.8504	1.09394e-87
SH3BP2	protein_coding	9760.23	1.66198	0.0837759	19.8384	1.38704e-87
ANXA9	protein_coding	809.308	-1.92453	0.0970935	-19.8214	1.94567e-87
PLIN2	protein_coding	54741.5	2.90517	0.146708	19.8024	2.83896e-87
ZNF503	protein_coding	1294.3	-1.92882	0.0974382	-19.7953	3.26782e-87
EMX1	protein_coding	1197.23	-2.61485	0.132164	-19.785	4.01283e-87
PRAM1	protein_coding	254.634	2.46509	0.124625	19.78	4.42573e-87
CCL5	protein_coding	4139.52	3.24095	0.163866	19.778	4.6063e-87
AEN	protein_coding	2085.41	1.39091	0.0703403	19.7741	4.97961e-87
HOXD8	protein_coding	2332.55	-1.77509	0.0897735	-19.7729	5.09238e-87
ARRDC2	protein_coding	4861.21	1.96658	0.0994735	19.7699	5.40989e-87
C6orf223	protein_coding	2940.54	3.48776	0.176443	19.7671	5.72211e-87
CD72	protein_coding	424.999	2.72415	0.13785	19.7616	6.36946e-87
CRHBP	protein_coding	403.104	-4.08185	0.207008	-19.7183	1.50045e-86
RNF150	protein_coding	1192.52	-3.15929	0.160417	-19.6943	2.41482e-86
ZNF425	protein_coding	167.398	-1.2267	0.0622871	-19.6943	2.41166e-86
AIF1L	protein_coding	15382.8	-3.22258	0.163699	-19.6861	2.83913e-86
FAM81A	protein_coding	317.673	-2.55303	0.12979	-19.6704	3.86579e-86
E2F1	protein_coding	365.17	2.19577	0.111721	19.6541	5.32813e-86
ALOX15B	protein_coding	241.921	4.2963	0.218637	19.6504	5.7353e-86
TBX21	protein_coding	139.163	2.47071	0.125924	19.6206	1.03089e-85
PAG1	protein_coding	2775.63	1.7034	0.086822	19.6194	1.05545e-85
GAL3ST1	protein_coding	8633.38	2.94448	0.150124	19.6137	1.18121e-85
TMEM178A	protein_coding	340.493	-3.22514	0.164436	-19.6133	1.19099e-85
SLC16A1	protein_coding	5140.29	2.03495	0.103774	19.6093	1.28666e-85
SUCLG1	protein_coding	6381.6	-1.75332	0.0894119	-19.6095	1.28383e-85
GZMA	protein_coding	1016.73	3.13224	0.159817	19.599	1.57765e-85
EYA4	protein_coding	276.543	-3.51273	0.179324	-19.5888	1.92798e-85
ALAD	protein_coding	3802.63	-1.28533	0.0656277	-19.5852	2.06855e-85
LST1	protein_coding	1052.14	2.26313	0.115568	19.5826	2.17649e-85
SLA2	protein_coding	304.68	2.91436	0.148832	19.5815	2.22312e-85
YBX3	protein_coding	16507.8	1.51923	0.0776108	19.575	2.52762e-85
IRF2BPL	protein_coding	2438.53	-1.47797	0.0755778	-19.5556	3.69627e-85
SLC7A8	protein_coding	4042.37	-3.58155	0.183243	-19.5454	4.51763e-85
PCK2	protein_coding	3986.24	-2.29998	0.117708	-19.5398	5.04043e-85
VAV1	protein_coding	799.024	2.30278	0.117933	19.5261	6.58976e-85
SCN1B	protein_coding	1068.74	2.00068	0.102471	19.5244	6.81719e-85
GRAMD1A	protein_coding	3991.92	1.31832	0.0675481	19.5168	7.90452e-85
SNX33	protein_coding	5987.36	1.30618	0.066939	19.513	8.51839e-85
BTG2	protein_coding	10043.4	-2.10479	0.107874	-19.5116	8.75059e-85
TNFRSF9	protein_coding	512.186	4.05121	0.207694	19.5057	9.82665e-85
DLL4	protein_coding	5163.82	2.42923	0.124773	19.4692	2.00516e-84
LGI4	protein_coding	5212.23	4.5904	0.235864	19.4621	2.30288e-84
GBP5	protein_coding	1921.82	3.48554	0.179161	19.4548	2.65409e-84
CP	protein_coding	25497.4	4.56982	0.234985	19.4473	3.073e-84
SLC15A2	protein_coding	494.937	-3.10606	0.15989	-19.4262	4.63759e-84
ASS1	protein_coding	14122.1	-2.7193	0.140002	-19.4232	4.91069e-84
SLC48A1	protein_coding	2348.52	-1.43352	0.0738056	-19.4229	4.94605e-84
CAPN12	protein_coding	1610.22	3.15245	0.162434	19.4075	6.66387e-84
MYO1G	protein_coding	991.45	2.64043	0.136086	19.4026	7.34036e-84
FKBP10	protein_coding	11894.3	2.80702	0.144753	19.3918	9.04972e-84
CORO1A	protein_coding	3784.95	2.43657	0.125669	19.3888	9.59341e-84
FERMT3	protein_coding	1720.42	2.11079	0.108909	19.3812	1.11303e-83
RAB11FIP4	protein_coding	1204.57	-1.97669	0.102015	-19.3764	1.22155e-83
PATL2	protein_coding	166.774	2.81401	0.145232	19.3759	1.23219e-83
BARX2	protein_coding	2579.16	2.6362	0.136283	19.3436	2.30874e-83
ZAP70	protein_coding	486.756	2.89652	0.149742	19.3434	2.31707e-83
FBXL8	protein_coding	450.106	1.91651	0.0990945	19.3403	2.46128e-83
HK3	protein_coding	316.064	2.59375	0.134155	19.3339	2.7829e-83
CASZ1	protein_coding	396.737	-2.06003	0.10658	-19.3286	3.08949e-83
KIF18B	protein_coding	170.516	3.24284	0.167841	19.3209	3.58163e-83
C10orf10	protein_coding	20574	2.26361	0.117186	19.3164	3.90892e-83
CTSW	protein_coding	815.74	3.03386	0.157169	19.3032	5.05167e-83
KCNN1	protein_coding	197.518	4.30546	0.223066	19.3013	5.23767e-83
BTK	protein_coding	598.238	2.17426	0.112655	19.3002	5.3539e-83
MTMR10	protein_coding	3910.67	-1.18259	0.0612795	-19.2984	5.54494e-83
XPNPEP2	protein_coding	1839.79	-5.38358	0.278973	-19.2978	5.60125e-83
CARD16	protein_coding	566.77	1.93905	0.10048	19.2979	5.59478e-83
MCAM	protein_coding	24735.9	2.07067	0.107369	19.2855	7.10885e-83
WIPF1	protein_coding	5809.18	1.39048	0.0721009	19.2852	7.14629e-83
TNFAIP8L2	protein_coding	401.041	2.26201	0.117294	19.2849	7.1909e-83
EFNA3	protein_coding	266.372	2.41954	0.125608	19.2626	1.10701e-82
AREL1	protein_coding	2128.2	-1.20305	0.0624629	-19.2603	1.15741e-82
EOMES	protein_coding	387.75	3.49568	0.181583	19.2511	1.38067e-82
GBP2	protein_coding	8180.05	1.98527	0.103178	19.2412	1.67213e-82
PNMA2	protein_coding	4411.71	2.82227	0.146919	19.2097	3.07128e-82
EVL	protein_coding	4570.04	1.67824	0.0874892	19.1823	5.20196e-82
CST7	protein_coding	909.562	3.12632	0.163105	19.1675	6.91224e-82
TAF1D	protein_coding	3425.79	1.48437	0.0774889	19.1559	8.64992e-82
PRSS53	protein_coding	182.697	3.5214	0.183844	19.1542	8.92119e-82
C1QA	protein_coding	12749.9	2.61818	0.136708	19.1516	9.39096e-82
INPP5D	protein_coding	2932.31	1.67946	0.0878973	19.1071	2.20554e-81
TRIB3	protein_coding	3404.9	3.14597	0.164664	19.1054	2.27722e-81
RASSF8	protein_coding	2171.84	-1.5363	0.0804968	-19.0852	3.35259e-81
ITGAL	protein_coding	2400.98	2.51799	0.131975	19.0793	3.75211e-81
APOBEC3C	protein_coding	3696.83	2.10979	0.110758	19.0487	6.74051e-81
HLA-G	protein_coding	2240.33	3.85289	0.202514	19.0253	1.05257e-80
MUC3A	protein_coding	1266.74	3.42952	0.180287	19.0225	1.10999e-80
TMEM133	protein_coding	1114.34	1.49603	0.0786612	19.0187	1.19385e-80
BAX	protein_coding	2874.93	1.24233	0.0653621	19.0069	1.49638e-80
ARHGAP24	protein_coding	4696.78	-1.64527	0.0865884	-19.001	1.67325e-80
KCNE3	protein_coding	4826.12	2.11799	0.111496	18.996	1.83971e-80
PPP2R2B	protein_coding	217.251	-2.29688	0.120923	-18.9946	1.89034e-80
PARD3B	protein_coding	1315.85	-1.44894	0.076285	-18.9938	1.91828e-80
CAVIN3	protein_coding	2889.41	2.31615	0.122003	18.9844	2.29628e-80
PAFAH2	protein_coding	1673.2	-1.06314	0.0560052	-18.9828	2.36503e-80
ARL11	protein_coding	174.087	1.93178	0.101774	18.9811	2.44227e-80
IFFO1	protein_coding	1400.49	1.77766	0.0936656	18.9788	2.5543e-80
TMEM52B	protein_coding	2016.02	-5.04675	0.266015	-18.9717	2.92432e-80
DEF6	protein_coding	777.416	2.27569	0.119953	18.9715	2.93176e-80
MYBL2	protein_coding	386.233	3.42651	0.180666	18.9659	3.26208e-80
GAB3	protein_coding	485.015	1.59638	0.0842105	18.957	3.86483e-80
TMEM140	protein_coding	6644.16	1.42197	0.0750145	18.9559	3.94746e-80
HCK	protein_coding	1397.79	2.04296	0.107893	18.9351	5.85507e-80
SQOR	protein_coding	3280.29	1.27681	0.067439	18.9328	6.12165e-80
MRO	protein_coding	531.052	-2.99865	0.158403	-18.9305	6.39742e-80
CD8A	protein_coding	2097.5	3.59355	0.18985	18.9283	6.66498e-80
LDHB	protein_coding	31785.7	-1.5492	0.0818836	-18.9195	7.87966e-80
SELPLG	protein_coding	1744.07	2.05652	0.108705	18.9184	8.05119e-80
ZNF44	protein_coding	1107.96	-1.35838	0.0718408	-18.9083	9.75244e-80
THEMIS2	protein_coding	2145.17	2.05628	0.10882	18.8962	1.22543e-79
CROT	protein_coding	1198.34	-1.27695	0.0676837	-18.8665	2.15117e-79
FAM26F	protein_coding	753.256	2.96522	0.15717	18.8664	2.15571e-79
APLN	protein_coding	5741.6	2.46455	0.130684	18.8588	2.48641e-79
CGREF1	protein_coding	1653.64	3.04439	0.161651	18.8332	4.03898e-79
ACY1	protein_coding	548.883	-2.19025	0.116379	-18.82	5.17723e-79
STX4	protein_coding	3304.76	1.17841	0.0626263	18.8165	5.53596e-79
CD37	protein_coding	1609.39	2.14664	0.114089	18.8155	5.63645e-79
MCM10	protein_coding	114.068	2.51661	0.133776	18.8122	6.00478e-79
PSTPIP1	protein_coding	434.788	2.78357	0.148128	18.7916	8.84854e-79
PHYKPL	protein_coding	4183.84	1.6158	0.0859978	18.7888	9.32008e-79
NKAIN1	protein_coding	145.906	4.03711	0.214917	18.7845	1.01155e-78
WAS	protein_coding	1024.19	2.18631	0.116657	18.7413	2.28029e-78
PYHIN1	protein_coding	246.67	2.95254	0.157637	18.73	2.82012e-78
AURKB	protein_coding	176.314	3.05093	0.162901	18.7288	2.88478e-78
SFXN3	protein_coding	4892.29	1.22433	0.0653776	18.7271	2.97688e-78
JAK3	protein_coding	1790.58	2.43821	0.130322	18.7091	4.1756e-78
FAM167A	protein_coding	403.468	-3.53779	0.189166	-18.702	4.76502e-78
ZFHX2	protein_coding	203.921	-1.76055	0.0941876	-18.692	5.75618e-78
SLC1A3	protein_coding	1246.25	2.69773	0.144381	18.6848	6.58446e-78
ZNF683	protein_coding	152.764	3.39811	0.181869	18.6844	6.63242e-78
TMEM45A	protein_coding	2588.22	3.49905	0.187309	18.6806	7.11861e-78
S1PR5	protein_coding	236.679	2.408	0.128925	18.6776	7.53806e-78
APOBEC3D	protein_coding	399.441	2.02094	0.108211	18.6759	7.77249e-78
BATF	protein_coding	200.38	3.03299	0.162437	18.6717	8.40779e-78
NAV2	protein_coding	2132.41	-1.63115	0.0874139	-18.6601	1.04547e-77
CD2	protein_coding	1307.75	3.01633	0.161667	18.6577	1.09345e-77
LILRA6	protein_coding	126.774	2.51849	0.135157	18.6338	1.70856e-77
CD84	protein_coding	1774.43	2.74871	0.147514	18.6336	1.71716e-77
AFAP1L2	protein_coding	2075.77	-1.86559	0.100163	-18.6255	1.99706e-77
APBB1IP	protein_coding	3216.96	2.42439	0.130191	18.6218	2.14068e-77
CRACR2A	protein_coding	255.379	2.1349	0.114674	18.6171	2.33662e-77
TNFSF14	protein_coding	398.709	3.79727	0.203984	18.6155	2.40446e-77
DGKZ	protein_coding	4481.31	1.28619	0.0691048	18.6122	2.56026e-77
IFI16	protein_coding	6057.42	1.61245	0.0866363	18.6117	2.58258e-77
SPARC	protein_coding	146542	1.82604	0.0981213	18.6101	2.66248e-77
CCDC186	protein_coding	1841.37	-1.32559	0.0712446	-18.6062	2.86467e-77
CDH8	protein_coding	119.736	3.43143	0.184556	18.5929	3.66886e-77
CAPN11	protein_coding	122.425	3.35011	0.180192	18.5918	3.74086e-77
HSPB8	protein_coding	13354.7	2.16678	0.11658	18.5863	4.14879e-77
MXD3	protein_coding	273.077	2.56902	0.138265	18.5803	4.63678e-77
DIRAS2	protein_coding	1628.01	2.97856	0.160446	18.5642	6.25865e-77
AVPR1B	protein_coding	206.787	3.72018	0.200536	18.5512	7.97746e-77
DDIT4	protein_coding	15827.3	2.17179	0.117123	18.5428	9.32003e-77
CXCL9	protein_coding	4564.13	3.58546	0.193367	18.5423	9.4127e-77
SLC25A33	protein_coding	390.172	-1.73654	0.0936864	-18.5357	1.06434e-76
CCR5	protein_coding	1111.94	2.88232	0.155535	18.5317	1.14655e-76
CLEC2B	protein_coding	1077.81	2.31221	0.124837	18.5219	1.37607e-76
CXCL10	protein_coding	2066.42	3.36266	0.181808	18.4957	2.23761e-76
ALB	protein_coding	1723.79	-5.06804	0.274041	-18.4937	2.32056e-76
MTCL1	protein_coding	2084.42	2.23626	0.120958	18.488	2.58125e-76
DPP9	protein_coding	4927.73	1.42821	0.0772566	18.4866	2.6461e-76
KIF21B	protein_coding	514.336	2.1121	0.114364	18.4683	3.71902e-76
CHSY3	protein_coding	314.525	2.20499	0.119409	18.4658	3.8887e-76
ACKR3	protein_coding	5098.11	2.29362	0.124229	18.4629	4.10995e-76
STRA8	protein_coding	146.048	3.30802	0.179214	18.4585	4.4543e-76
MS4A6A	protein_coding	4467.91	2.23297	0.121021	18.4511	5.11253e-76
BMP1	protein_coding	3138.04	1.86938	0.101321	18.45	5.21185e-76
CCNA2	protein_coding	353.475	2.2457	0.121746	18.4459	5.63e-76
TYRO3	protein_coding	725.399	-2.2399	0.121502	-18.4351	6.87485e-76
PLOD3	protein_coding	6988.92	1.3937	0.0756016	18.4349	6.90051e-76
STK10	protein_coding	3219.18	1.18364	0.0642481	18.423	8.59657e-76
NAALADL2	protein_coding	516.302	-1.93922	0.105301	-18.4161	9.76464e-76
KLHL13	protein_coding	972.871	-2.17824	0.118408	-18.3962	1.41022e-75
TBC1D10C	protein_coding	615.492	2.54154	0.138155	18.3962	1.40789e-75
RAB37	protein_coding	741.957	1.90278	0.103525	18.38	1.90038e-75
IFNGR2	protein_coding	6450.22	1.11178	0.0605593	18.3586	2.81953e-75
EHBP1L1	protein_coding	3471.77	1.43295	0.0780849	18.3512	3.22657e-75
MYO9B	protein_coding	5049.99	1.16136	0.0632898	18.3498	3.31223e-75
CASP4	protein_coding	3282.68	1.2511	0.0682099	18.342	3.82766e-75
SREBF2	protein_coding	6121.3	-1.26157	0.0688693	-18.3183	5.91048e-75
CLEC7A	protein_coding	824.225	2.32	0.126717	18.3086	7.0724e-75
PCGF1	protein_coding	860.197	1.04089	0.0568616	18.3057	7.45907e-75
C1orf226	protein_coding	367.846	-2.77293	0.151616	-18.2892	1.00854e-74
GMIP	protein_coding	1138.02	1.60299	0.0876645	18.2855	1.07898e-74
SIRPB2	protein_coding	349.888	2.11952	0.115926	18.2834	1.1211e-74
PLEKHG2	protein_coding	3030.81	1.74934	0.0957664	18.2668	1.5221e-74
NEK6	protein_coding	7047.57	1.95762	0.107199	18.2616	1.6742e-74
CDT1	protein_coding	326.602	2.28717	0.125352	18.246	2.22781e-74
TCAF2	protein_coding	678.824	1.65781	0.0908626	18.2452	2.25862e-74
NCKAP1L	protein_coding	2899.08	2.29102	0.125594	18.2415	2.4195e-74
PTP4A3	protein_coding	3232.83	1.89276	0.103805	18.2338	2.78518e-74
POLR3B	protein_coding	645.757	-1.23449	0.0677528	-18.2205	3.55117e-74
UNC13D	protein_coding	839.498	2.1803	0.119695	18.2155	3.89151e-74
KIF14	protein_coding	117.493	2.72692	0.14971	18.2147	3.94769e-74
TCAIM	protein_coding	1815.7	-1.08099	0.0593513	-18.2134	4.03989e-74
ARHGAP30	protein_coding	2084.17	2.01813	0.110806	18.2131	4.05917e-74
ASF1B	protein_coding	390.307	2.17102	0.119292	18.1992	5.2355e-74
CLEC12A	protein_coding	234.086	2.78648	0.153274	18.1797	7.47785e-74
PDP2	protein_coding	877.148	-1.56813	0.086291	-18.1726	8.50209e-74
SLC17A9	protein_coding	605.488	3.3613	0.185067	18.1626	1.0214e-73
HPCAL1	protein_coding	12587.5	1.84322	0.101579	18.1456	1.39043e-73
NIPAL1	protein_coding	346.816	-3.25464	0.179375	-18.1443	1.42422e-73
ITPRIPL1	protein_coding	143.325	1.78422	0.0983946	18.1333	1.74074e-73
PEPD	protein_coding	7812.18	-1.87272	0.103297	-18.1295	1.86296e-73
SAMD3	protein_coding	149.751	2.29991	0.126958	18.1155	2.40473e-73
RAB7B	protein_coding	346.27	2.06226	0.113851	18.1136	2.48944e-73
EBF2	protein_coding	756.194	2.69641	0.148872	18.1122	2.55282e-73
BBC3	protein_coding	595.539	1.7156	0.0947261	18.1111	2.60356e-73
PAPPA	protein_coding	665.033	-3.19381	0.176352	-18.1104	2.63993e-73
E2F2	protein_coding	117.004	2.36078	0.130395	18.1049	2.91686e-73
SLCO1C1	protein_coding	101.736	2.49746	0.137944	18.1049	2.91404e-73
IL16	protein_coding	1392.88	1.85404	0.102431	18.1003	3.16798e-73
IL10RA	protein_coding	2887.52	2.22394	0.122869	18.1001	3.18236e-73
STAT4	protein_coding	322.446	1.86597	0.103109	18.097	3.36283e-73
HVCN1	protein_coding	606.135	1.39557	0.0771381	18.0918	3.6965e-73
HLA-DPB1	protein_coding	27440.3	2.06416	0.114108	18.0895	3.85296e-73
C11orf21	protein_coding	127.262	2.63888	0.1459	18.0869	4.04046e-73
CD244	protein_coding	159.535	2.30333	0.127353	18.0862	4.09078e-73
MRPL33	protein_coding	1672.33	-1.07846	0.0596428	-18.082	4.42141e-73
PPM1K	protein_coding	1539.93	-1.55036	0.0857787	-18.0739	5.11204e-73
ZHX3	protein_coding	4612.12	-1.30814	0.072387	-18.0715	5.34278e-73
LIN52	protein_coding	631.778	-1.11936	0.0619958	-18.0553	7.16147e-73
LSP1	protein_coding	2935.22	2.25861	0.125117	18.0521	7.59959e-73
ITGA5	protein_coding	11925.2	1.96874	0.109066	18.0509	7.75671e-73
FCRL6	protein_coding	155.52	2.49151	0.138085	18.0433	8.90632e-73
EPCAM	protein_coding	5166.51	-2.86661	0.158888	-18.0417	9.1699e-73
PRDX4	protein_coding	5504.15	1.43023	0.0793074	18.034	1.05355e-72
INTS6L	protein_coding	700.662	1.73796	0.0964445	18.0203	1.34934e-72
ACSL4	protein_coding	5990.42	-1.52311	0.0845231	-18.0201	1.35568e-72
LTB4R2	protein_coding	131.748	2.18426	0.121214	18.0199	1.35988e-72
SCGN	protein_coding	2230.76	4.67613	0.259528	18.0178	1.41175e-72
HJURP	protein_coding	209.993	2.90466	0.161215	18.0174	1.42379e-72
DEPTOR	protein_coding	2020.61	-1.56607	0.0869623	-18.0086	1.66819e-72
MPP7	protein_coding	894.431	-2.83066	0.157282	-17.9974	2.04146e-72
SORD	protein_coding	1629.8	-2.19104	0.121842	-17.9827	2.6613e-72
CHST11	protein_coding	2493.65	1.7816	0.0990855	17.9804	2.77471e-72
CRTAM	protein_coding	162.622	3.03143	0.168656	17.974	3.11421e-72
C9orf172	protein_coding	425.122	2.07114	0.11527	17.9678	3.48311e-72
DLGAP5	protein_coding	190.32	2.7321	0.152092	17.9634	3.76987e-72
MSC	protein_coding	2261.87	3.10284	0.17275	17.9614	3.90647e-72
CCSER1	protein_coding	187.489	-2.61822	0.145888	-17.9468	5.0867e-72
GDF6	protein_coding	861.349	3.51735	0.196009	17.9449	5.26379e-72
BCL9	protein_coding	1352.47	-1.06991	0.0596603	-17.9333	6.48369e-72
PTH1R	protein_coding	2643.5	-3.25233	0.18138	-17.931	6.7504e-72
CXCL11	protein_coding	481.586	3.47044	0.193562	17.9293	6.96446e-72
PCLAF	protein_coding	309.439	2.23435	0.124648	17.9253	7.48187e-72
IL21R	protein_coding	320.536	2.61048	0.145637	17.9246	7.57494e-72
MPP5	protein_coding	2824.26	-1.41179	0.0788204	-17.9114	9.60385e-72
IYD	protein_coding	471.935	-4.27096	0.238499	-17.9076	1.02829e-71
MOB3A	protein_coding	4483.3	1.09415	0.0611183	17.9022	1.13361e-71
PPFIA4	protein_coding	1707.45	3.14256	0.175543	17.9019	1.13919e-71
GAPDH	protein_coding	237262	1.47622	0.0824918	17.8954	1.28179e-71
SPTB	protein_coding	202.895	-2.66102	0.148701	-17.8951	1.28686e-71
CPEB3	protein_coding	683.817	-1.39726	0.0780891	-17.8931	1.33472e-71
HAPLN3	protein_coding	587.06	2.40021	0.134246	17.8792	1.71248e-71
PDHB	protein_coding	3115.03	-1.16214	0.065009	-17.8766	1.79458e-71
PCDH9	protein_coding	320.026	-3.32373	0.186092	-17.8606	2.38849e-71
SNX20	protein_coding	570.52	2.45281	0.137335	17.86	2.41629e-71
CCL4	protein_coding	919.625	2.65261	0.148526	17.8596	2.43455e-71
PEG3	protein_coding	443.872	-2.40386	0.134665	-17.8507	2.8541e-71
CEP55	protein_coding	302.99	2.61684	0.1466	17.8502	2.88012e-71
HRH2	protein_coding	913.289	3.43769	0.192676	17.8418	3.34747e-71
CYTH4	protein_coding	1434.39	1.95394	0.109528	17.8396	3.48165e-71
CXCR3	protein_coding	330.468	3.17832	0.178169	17.8388	3.53114e-71
GNRH1	protein_coding	113.895	2.78884	0.156393	17.8323	3.9695e-71
MAGI2	protein_coding	702.776	-1.61983	0.0908629	-17.8272	4.34641e-71
HMOX1	protein_coding	16609.6	2.33254	0.130932	17.8149	5.41944e-71
PGGHG	protein_coding	6478.14	3.55948	0.199833	17.8123	5.67587e-71
NDC80	protein_coding	247.663	2.04758	0.115086	17.7918	8.18813e-71
RIN3	protein_coding	2202.02	1.4173	0.079662	17.7914	8.23226e-71
BPHL	protein_coding	1513.16	-1.60313	0.0901163	-17.7896	8.51122e-71
MMP25	protein_coding	151.083	2.0882	0.117469	17.7766	1.07338e-70
RNF166	protein_coding	1194.99	1.29345	0.0728002	17.7671	1.27112e-70
MAP6	protein_coding	358.297	-2.40835	0.135629	-17.7569	1.52327e-70
DAG1	protein_coding	6979.42	-1.15242	0.0649081	-17.7546	1.58895e-70
LGALS1	protein_coding	15411.7	2.16554	0.122034	17.7453	1.87283e-70
MATK	protein_coding	321.625	2.26247	0.127539	17.7394	2.08127e-70
CTH	protein_coding	290.439	-1.87066	0.105531	-17.7262	2.63296e-70
EBI3	protein_coding	335.383	2.31191	0.130456	17.7217	2.84936e-70
ADGRV1	protein_coding	273.511	-2.88243	0.16266	-17.7205	2.91065e-70
SPHK2	protein_coding	799.009	-1.19923	0.0677163	-17.7095	3.53906e-70
CXCR6	protein_coding	395.511	2.67832	0.151297	17.7024	4.01798e-70
NCF4	protein_coding	663.639	2.02377	0.114374	17.6944	4.63227e-70
PLEKHN1	protein_coding	176.9	2.47849	0.140083	17.693	4.74429e-70
IL10RB	protein_coding	2722.24	1.03315	0.058394	17.6928	4.76443e-70
ACAD8	protein_coding	1648.38	-1.10342	0.0623887	-17.6862	5.36039e-70
C2orf15	protein_coding	131.203	-1.86769	0.105605	-17.6856	5.41479e-70
ZMYND15	protein_coding	328.778	1.73038	0.0978495	17.6841	5.56236e-70
RASGRP4	protein_coding	202.853	1.7381	0.0983199	17.678	6.19151e-70
LPAR5	protein_coding	423.174	2.15651	0.122022	17.6731	6.76031e-70
DTL	protein_coding	350.822	2.13306	0.12071	17.671	7.01548e-70
CAMKK1	protein_coding	898.873	1.4619	0.0827311	17.6705	7.07127e-70
TGFBR3	protein_coding	3323.66	-1.63484	0.0925536	-17.6638	7.97572e-70
FCHO1	protein_coding	342.085	2.64107	0.149555	17.6595	8.59977e-70
ADAMDEC1	protein_coding	339.743	4.28969	0.242913	17.6594	8.62072e-70
GINS2	protein_coding	343.242	1.91865	0.108668	17.656	9.15328e-70
ATG16L2	protein_coding	1520.86	2.30785	0.130728	17.6539	9.50186e-70
SORT1	protein_coding	8154.74	-1.53707	0.0870898	-17.6492	1.03168e-69
ABCC3	protein_coding	10386.7	2.3089	0.130862	17.6437	1.13682e-69
PLXND1	protein_coding	14604.5	1.60016	0.0907066	17.6411	1.19173e-69
CCNE2	protein_coding	99.5538	1.52583	0.086559	17.6276	1.51225e-69
RASA3	protein_coding	2278.72	1.39655	0.0792412	17.624	1.61133e-69
AC009779.3	protein_coding	209.161	2.02098	0.114678	17.623	1.64014e-69
LZTS3	protein_coding	1381.41	-2.30215	0.13065	-17.6207	1.70809e-69
DTX1	protein_coding	419.03	-2.45593	0.139381	-17.6203	1.72122e-69
TTYH3	protein_coding	15086.6	1.93405	0.109802	17.614	1.92422e-69
CD6	protein_coding	621.57	2.36999	0.134747	17.5885	3.01752e-69
ANO4	protein_coding	502.822	3.66877	0.208601	17.5875	3.06945e-69
H1F0	protein_coding	8730.02	-1.89894	0.10806	-17.573	3.96719e-69
REEP6	protein_coding	325.311	-2.95686	0.168322	-17.5667	4.43116e-69
DTX2	protein_coding	790.357	1.31511	0.0748792	17.5631	4.72057e-69
CD300C	protein_coding	175.396	2.29082	0.130468	17.5584	5.12604e-69
HPCA	protein_coding	90.1621	2.80827	0.160007	17.551	5.84553e-69
SIRPG	protein_coding	253.558	3.38043	0.192876	17.5264	9.00426e-69
GZMB	protein_coding	340.252	2.57343	0.14693	17.5147	1.10657e-68
MAP4K1	protein_coding	569.782	2.40031	0.137049	17.5142	1.11686e-68
LOXL2	protein_coding	6963.11	2.68946	0.153607	17.5087	1.23063e-68
DOK1	protein_coding	825.227	1.25372	0.0716544	17.4968	1.5165e-68
CD33	protein_coding	347.431	1.93666	0.11069	17.4963	1.53017e-68
SLC47A2	protein_coding	573.195	-3.92211	0.224383	-17.4795	2.05314e-68
PLCB2	protein_coding	1372.39	2.12431	0.121624	17.4662	2.59131e-68
RGS5	protein_coding	125494	2.58928	0.148313	17.4582	2.98016e-68
CAB39L	protein_coding	1090.51	-1.66238	0.0952243	-17.4575	3.01848e-68
HAPLN1	protein_coding	1003.74	3.53597	0.202689	17.4453	3.739e-68
QRFPR	protein_coding	745.593	2.92057	0.16744	17.4424	3.9296e-68
CENPU	protein_coding	360.753	1.83333	0.105202	17.4268	5.1681e-68
PARP15	protein_coding	173.742	2.6473	0.151933	17.4242	5.40737e-68
CD8B	protein_coding	405.217	3.40798	0.195675	17.4165	6.1809e-68
SLAMF8	protein_coding	1130.65	2.71299	0.155819	17.4112	6.78656e-68
SLC14A1	protein_coding	1083.79	-3.01083	0.173018	-17.4018	7.99243e-68
LMBR1L	protein_coding	1791.75	1.39319	0.0800635	17.4011	8.09699e-68
EFHD2	protein_coding	4064.24	1.44992	0.0833305	17.3997	8.29833e-68
SERPINA5	protein_coding	3133.44	-4.86806	0.279852	-17.3951	8.98231e-68
CD276	protein_coding	4224.59	1.2126	0.0697214	17.3921	9.47617e-68
SLFN11	protein_coding	3174.94	1.68319	0.0968075	17.387	1.03459e-67
TPX2	protein_coding	834.327	2.51381	0.144691	17.3736	1.30754e-67
TMEM131L	protein_coding	1238.5	1.08921	0.0627206	17.366	1.49311e-67
NCF1	protein_coding	229.462	2.29776	0.13239	17.356	1.77671e-67
LHFPL2	protein_coding	3336.57	1.99945	0.115203	17.3559	1.78122e-67
CSNK1E	protein_coding	5971.3	1.1136	0.0641667	17.3547	1.81677e-67
CDH4	protein_coding	1616.72	4.07133	0.234804	17.3392	2.37834e-67
CHFR	protein_coding	1326.38	1.11131	0.0640935	17.3388	2.39536e-67
GPC3	protein_coding	1435.73	-3.69178	0.21298	-17.3339	2.6089e-67
NCAPG	protein_coding	241.072	2.37737	0.137198	17.3281	2.88927e-67
LAG3	protein_coding	599.3	3.57206	0.206247	17.3193	3.36193e-67
OR51E1	protein_coding	470.535	2.49495	0.144142	17.3089	4.02777e-67
NOD2	protein_coding	273.753	2.44766	0.14146	17.3028	4.47801e-67
TNFSF13B	protein_coding	922.945	2.5113	0.145178	17.2981	4.86041e-67
USP53	protein_coding	2321.32	-1.44917	0.0838264	-17.2877	5.82297e-67
TEX11	protein_coding	335.768	4.22778	0.244607	17.284	6.20978e-67
PLEKHO1	protein_coding	2951.13	1.79131	0.103732	17.2687	8.09722e-67
CACNA2D3	protein_coding	165.813	-2.09924	0.121578	-17.2666	8.39879e-67
SIGLEC1	protein_coding	1343.19	2.53095	0.146596	17.2648	8.66747e-67
B2M	protein_coding	222348	1.33026	0.0770695	17.2605	9.32729e-67
CD200	protein_coding	2295.73	1.66536	0.0964936	17.2588	9.61239e-67
UBASH3A	protein_coding	174.797	2.78665	0.161471	17.2579	9.76366e-67
EYA3	protein_coding	2010	-1.01342	0.0587584	-17.2473	1.17283e-66
RIMKLA	protein_coding	1748.33	2.32466	0.134785	17.2471	1.17662e-66
GPR4	protein_coding	3128.63	1.94162	0.112592	17.2447	1.22637e-66
SPINK13	protein_coding	366.262	4.64477	0.269424	17.2397	1.33844e-66
BRCA2	protein_coding	265.156	1.64731	0.0955691	17.2368	1.40524e-66
FFAR4	protein_coding	99.165	2.76268	0.160327	17.2315	1.54186e-66
CDKN2C	protein_coding	1396.04	1.54706	0.0897882	17.2301	1.57851e-66
NLRC4	protein_coding	250.839	1.75283	0.101748	17.2272	1.66016e-66
HPD	protein_coding	2414.44	-4.85705	0.281955	-17.2263	1.68518e-66
ST6GAL1	protein_coding	10307.8	-2.18231	0.126707	-17.2233	1.77713e-66
SH2D2A	protein_coding	345.656	2.74446	0.159556	17.2006	2.6275e-66
CD7	protein_coding	467.235	2.75735	0.160326	17.1983	2.73343e-66
CSTA	protein_coding	209.908	2.3389	0.136011	17.1964	2.82601e-66
CD86	protein_coding	979.504	2.13136	0.123949	17.1955	2.86914e-66
MAP4K4	protein_coding	8661.42	1.19927	0.0697912	17.1837	3.51663e-66
FAM222A	protein_coding	296.262	-2.73331	0.159073	-17.1827	3.5785e-66
TKFC	protein_coding	2916.23	-1.23569	0.0719193	-17.1816	3.64932e-66
ASPHD1	protein_coding	707.159	2.66688	0.155262	17.1767	3.97128e-66
MCM5	protein_coding	2825.23	1.0628	0.0618799	17.1751	4.07767e-66
CDON	protein_coding	1632.38	2.2221	0.1294	17.1723	4.28236e-66
LDLRAD3	protein_coding	1218.35	1.47765	0.0860922	17.1636	4.97722e-66
SLC25A25	protein_coding	1279.8	-1.88787	0.11004	-17.1562	5.64947e-66
TGFB1	protein_coding	7682.79	1.58266	0.0923071	17.1456	6.77734e-66
AMFR	protein_coding	9273.43	-1.40217	0.08178	-17.1456	6.77416e-66
RNF43	protein_coding	427.582	-2.56963	0.149902	-17.1421	7.20256e-66
ABCB6	protein_coding	619.231	1.75993	0.1027	17.1366	7.91626e-66
HLA-DQB1	protein_coding	18470.7	2.2976	0.134101	17.1333	8.37202e-66
EMP3	protein_coding	3605.43	1.71736	0.100261	17.129	9.02645e-66
MYO6	protein_coding	6838.75	-1.26291	0.0737355	-17.1275	9.2481e-66
ELOVL2	protein_coding	294.32	3.22299	0.188176	17.1275	9.2547e-66
CHIT1	protein_coding	893.052	5.07181	0.296165	17.1249	9.67168e-66
KSR1	protein_coding	6343.74	1.90897	0.111482	17.1235	9.91394e-66
CD27	protein_coding	540.472	3.31016	0.193508	17.1061	1.33746e-65
DEGS2	protein_coding	395.356	-2.97343	0.173855	-17.1029	1.4115e-65
SLFN12L	protein_coding	129.969	2.57766	0.150719	17.1024	1.42297e-65
PPP1R3C	protein_coding	4038.17	1.9621	0.114736	17.101	1.45942e-65
SUOX	protein_coding	2478.26	-1.06679	0.0623877	-17.0994	1.49954e-65
NAPEPLD	protein_coding	1835.58	-1.21143	0.0708766	-17.092	1.70128e-65
HOMER1	protein_coding	509.692	-2.20283	0.128905	-17.0888	1.79892e-65
CD3D	protein_coding	590.501	2.88909	0.169088	17.0863	1.8767e-65
IFNAR2	protein_coding	1424.19	1.09694	0.064212	17.0831	1.9843e-65
DARS	protein_coding	11129.8	1.05348	0.0616699	17.0825	2.00206e-65
IQGAP3	protein_coding	520.933	2.49202	0.145906	17.0797	2.1036e-65
ANXA2R	protein_coding	245.884	2.04039	0.119478	17.0775	2.18286e-65
PCSK6	protein_coding	5302.27	2.96781	0.173825	17.0735	2.33641e-65
SELENBP1	protein_coding	2754.26	-1.71485	0.100478	-17.0669	2.61942e-65
ADGRE1	protein_coding	223.003	2.74265	0.160709	17.0659	2.66208e-65
ADK	protein_coding	1138.51	-1.15863	0.0679108	-17.061	2.89441e-65
ERBB2	protein_coding	9337.74	-1.47337	0.0864382	-17.0454	3.78195e-65
DNMBP	protein_coding	1820.3	-1.01311	0.0594405	-17.0441	3.86642e-65
FMNL3	protein_coding	5359.92	1.26062	0.0739722	17.0418	4.02013e-65
AOAH	protein_coding	1223.09	2.16165	0.126931	17.0301	4.91468e-65
MILR1	protein_coding	280.876	1.97615	0.116039	17.03	4.91633e-65
FCGR2A	protein_coding	3062.36	1.86423	0.109506	17.024	5.4536e-65
TGFBI	protein_coding	92268.6	4.13559	0.242929	17.0239	5.46006e-65
SLC24A4	protein_coding	86.6705	1.71058	0.100524	17.0166	6.18274e-65
CENPK	protein_coding	156.619	1.91923	0.112828	17.0103	6.89083e-65
POMGNT2	protein_coding	1012.88	-1.12679	0.0662432	-17.0099	6.93947e-65
YEATS2	protein_coding	3262.68	1.07562	0.0632425	17.0079	7.1816e-65
CD96	protein_coding	667.543	2.46705	0.145063	17.0067	7.31931e-65
CYGB	protein_coding	2550.04	2.03037	0.119414	17.0028	7.83177e-65
FXYD5	protein_coding	4829.65	1.78116	0.104829	16.9911	9.55629e-65
GPRIN1	protein_coding	309.594	2.18664	0.12876	16.9824	1.10952e-64
ZNF469	protein_coding	311.21	2.05545	0.121038	16.9818	1.12074e-64
CD4	protein_coding	5643.24	1.78967	0.105404	16.9791	1.17258e-64
PLEK	protein_coding	2089.6	2.24491	0.13224	16.9761	1.23378e-64
INO80E	protein_coding	2644.7	1.22249	0.0720794	16.9604	1.61361e-64
BRCC3	protein_coding	915.117	-1.10333	0.0650801	-16.9534	1.81773e-64
EMILIN2	protein_coding	1259.9	1.6749	0.0988698	16.9405	2.26181e-64
CORO7	protein_coding	794.457	1.55407	0.0917496	16.9381	2.35469e-64
CLEC4A	protein_coding	226.188	1.6804	0.0992126	16.9374	2.38451e-64
FMO5	protein_coding	721.535	-2.4745	0.146231	-16.9218	3.10523e-64
PREX1	protein_coding	5470.62	1.3441	0.0794381	16.92	3.2022e-64
UBD	protein_coding	1457.14	3.17029	0.187423	16.9152	3.47811e-64
SCG2	protein_coding	442.705	3.92009	0.231813	16.9106	3.7614e-64
NICN1	protein_coding	979.879	-1.08467	0.0641528	-16.9077	3.95057e-64
FHOD1	protein_coding	2079.19	1.26534	0.0748609	16.9026	4.30463e-64
CSF2RA	protein_coding	731.44	1.92708	0.114184	16.8769	6.65188e-64
ATP2B2	protein_coding	877.424	3.40257	0.201644	16.8741	6.97404e-64
SLC11A1	protein_coding	735.517	2.39206	0.141806	16.8686	7.66263e-64
TOP2B	protein_coding	5855.57	-1.00556	0.0596162	-16.8671	7.85056e-64
MICALL2	protein_coding	1554.49	2.06259	0.122357	16.8571	9.30556e-64
ASPM	protein_coding	367.366	2.62615	0.155803	16.8556	9.54867e-64
HLA-C	protein_coding	104562	1.34285	0.0796729	16.8546	9.71091e-64
DOCK2	protein_coding	2029.57	2.21626	0.131533	16.8495	1.05764e-63
OMA1	protein_coding	844.202	-1.01081	0.0600327	-16.8376	1.293e-63
PDIA5	protein_coding	4072.18	1.75624	0.104314	16.8361	1.32674e-63
TSPAN6	protein_coding	3516.33	-1.2556	0.0745918	-16.833	1.39837e-63
FBXO17	protein_coding	6564.5	1.54222	0.0916188	16.833	1.399e-63
KCNE4	protein_coding	2058.58	2.04898	0.121733	16.8318	1.4259e-63
CENPM	protein_coding	172.49	2.22272	0.13207	16.8299	1.47439e-63
GTSE1	protein_coding	200.188	2.34669	0.139448	16.8285	1.50889e-63
SUSD4	protein_coding	524.463	-3.6674	0.217949	-16.8269	1.54993e-63
TOM1L2	protein_coding	4187	-1.06013	0.0630306	-16.8192	1.764e-63
FAM49A	protein_coding	1129.13	1.55207	0.0923202	16.8119	1.99807e-63
SCCPDH	protein_coding	3621.55	-1.33247	0.0792708	-16.809	2.09503e-63
ERO1A	protein_coding	7538.33	1.48092	0.0881087	16.8078	2.13875e-63
BEST1	protein_coding	428.935	1.88559	0.112215	16.8034	2.3051e-63
MARVELD2	protein_coding	954.789	-2.39374	0.14248	-16.8006	2.417e-63
SLC15A3	protein_coding	2494.37	1.65864	0.0987311	16.7995	2.45921e-63
NT5DC3	protein_coding	2457.24	2.26326	0.134762	16.7945	2.67539e-63
GM2A	protein_coding	6840.98	1.36055	0.0810144	16.7939	2.70494e-63
MAGI3	protein_coding	911.588	-1.86622	0.111162	-16.7882	2.97733e-63
SERPINH1	protein_coding	13647.5	1.56592	0.0932816	16.787	3.03721e-63
SYNJ2BP	protein_coding	3303.44	-1.27869	0.076194	-16.782	3.30395e-63
KIAA1522	protein_coding	4309.37	-1.40658	0.0838265	-16.7796	3.43958e-63
BID	protein_coding	1451.86	1.10426	0.065833	16.7736	3.80732e-63
2020-09-01	protein_coding	746.627	1.84354	0.109947	16.7676	4.21489e-63
ZBP1	protein_coding	146.448	2.86781	0.171155	16.7556	5.15009e-63
HLA-E	protein_coding	79705.7	1.06207	0.0634747	16.7322	7.6405e-63
KLHL8	protein_coding	1660.44	-1.01193	0.0604997	-16.7262	8.43942e-63
BATF3	protein_coding	216.824	2.13333	0.127548	16.7256	8.52577e-63
ADA	protein_coding	738.114	2.24223	0.134229	16.7045	1.21447e-62
COX4I2	protein_coding	715.609	2.8682	0.171995	16.6761	1.95704e-62
ACLY	protein_coding	24514.7	1.34619	0.0807494	16.6713	2.12085e-62
GZMK	protein_coding	939.888	3.33482	0.200057	16.6694	2.18962e-62
SKA3	protein_coding	129.782	2.08711	0.125223	16.6672	2.27076e-62
ARHGAP11B	protein_coding	139.153	1.85341	0.111244	16.6607	2.53176e-62
DOK2	protein_coding	576.337	1.88529	0.113254	16.6465	3.20997e-62
BAZ1A	protein_coding	1996.25	1.17638	0.0706768	16.6446	3.31445e-62
GFI1	protein_coding	159.314	2.46881	0.148374	16.6391	3.62731e-62
SLC27A3	protein_coding	2048.54	1.50135	0.0902318	16.6388	3.64951e-62
BTN3A3	protein_coding	3076.95	1.44289	0.0867239	16.6377	3.71708e-62
KIF4A	protein_coding	293.892	2.22593	0.133825	16.6332	4.00695e-62
SCARF1	protein_coding	1832.19	1.52706	0.0918904	16.6182	5.14354e-62
HSD3B7	protein_coding	4329.93	2.24509	0.135143	16.6128	5.63109e-62
PDE1A	protein_coding	2307.02	-2.80327	0.16875	-16.612	5.70344e-62
SLC25A35	protein_coding	325.086	-1.57459	0.0948	-16.6096	5.94186e-62
HES4	protein_coding	540.839	2.32145	0.139769	16.6092	5.97785e-62
COL4A4	protein_coding	2042.83	-2.17487	0.131016	-16.6001	6.95666e-62
DPEP1	protein_coding	2337.83	-4.37976	0.264039	-16.5875	8.57547e-62
LRRK1	protein_coding	1975.88	1.63012	0.0982796	16.5866	8.71428e-62
MYDGF	protein_coding	5017.85	1.2556	0.0757018	16.5862	8.76992e-62
KIAA0895L	protein_coding	1526.87	2.05292	0.123798	16.5827	9.28905e-62
PTGDR	protein_coding	92.0936	2.18328	0.131681	16.5801	9.7136e-62
RTEL1-TNFRSF6B	protein_coding	198.364	2.46292	0.148673	16.5661	1.22612e-61
SLC2A1	protein_coding	16632.3	1.99761	0.120627	16.5601	1.35285e-61
PTTG1	protein_coding	411.104	2.38796	0.144201	16.5599	1.35722e-61
PLK1	protein_coding	315.626	2.39648	0.144742	16.5569	1.42646e-61
CCDC127	protein_coding	2456.7	1.04926	0.0634015	16.5494	1.61603e-61
SNRPN	protein_coding	4197.34	-1.20957	0.0731416	-16.5374	1.97413e-61
SLC26A4	protein_coding	233.191	-3.27269	0.19803	-16.5263	2.37401e-61
ADAMTS14	protein_coding	190.911	3.40568	0.206256	16.5119	3.01392e-61
RPS2	protein_coding	42583.6	1.48485	0.089941	16.5091	3.154e-61
CDH16	protein_coding	21406.1	-2.36558	0.143296	-16.5083	3.19573e-61
CD53	protein_coding	3613.28	1.80351	0.109258	16.5068	3.27819e-61
TBX15	protein_coding	339.455	3.02312	0.183396	16.4841	4.77112e-61
FAM57A	protein_coding	1620.9	1.59269	0.0966865	16.4727	5.76178e-61
P4HB	protein_coding	59439.2	1.41335	0.0858999	16.4535	7.91471e-61
SEMA6A	protein_coding	6264.65	1.90224	0.115659	16.447	8.81844e-61
ARHGAP15	protein_coding	864.739	1.59754	0.0971354	16.4466	8.87631e-61
GIT2	protein_coding	3630.22	1.28399	0.0781029	16.4397	9.93425e-61
CD3E	protein_coding	1679.46	2.65746	0.161688	16.4357	1.06115e-60
LIG1	protein_coding	1556.8	1.03539	0.0630581	16.4197	1.38292e-60
EIF4EBP1	protein_coding	2471.73	2.1408	0.130402	16.4169	1.44709e-60
IDI1	protein_coding	1998.32	-1.03109	0.0628074	-16.4166	1.45417e-60
BUB1	protein_coding	340.813	2.40966	0.146812	16.4133	1.53668e-60
SLAMF7	protein_coding	1178.4	2.81688	0.171707	16.4051	1.75838e-60
CXorf36	protein_coding	3826.8	1.88722	0.115081	16.399	1.9432e-60
DNAJB13	protein_coding	208.17	3.70929	0.226299	16.3911	2.21243e-60
CLDN10	protein_coding	2243.91	-2.30311	0.140592	-16.3815	2.59123e-60
BTN2A2	protein_coding	1562.88	1.16706	0.0712503	16.3798	2.667e-60
NUAK2	protein_coding	1870.2	-2.11607	0.129225	-16.375	2.88477e-60
IL18BP	protein_coding	1951.69	1.52783	0.0933034	16.3749	2.89162e-60
BIRC3	protein_coding	9949.35	2.29062	0.139991	16.3626	3.53443e-60
S100A2	protein_coding	823.588	-3.45316	0.211051	-16.3617	3.58889e-60
SIRPA	protein_coding	12404.4	1.54023	0.094158	16.3579	3.81982e-60
B4GALNT1	protein_coding	878.11	4.0028	0.244707	16.3575	3.84435e-60
ARHGAP45	protein_coding	2570.98	1.49718	0.0915335	16.3566	3.90418e-60
SPN	protein_coding	1171	2.12445	0.129891	16.3557	3.96377e-60
MELK	protein_coding	215.024	2.38541	0.145864	16.3537	4.09538e-60
AKIRIN1	protein_coding	2795.57	-1.09916	0.0672539	-16.3435	4.83877e-60
LRBA	protein_coding	5745.31	-1.24239	0.0760336	-16.34	5.12497e-60
SPC24	protein_coding	220.667	2.33589	0.142978	16.3374	5.34633e-60
PPP1R13L	protein_coding	2831.5	1.60582	0.0983148	16.3335	5.70435e-60
CAPN15	protein_coding	2950.39	1.30793	0.0800876	16.3312	5.91856e-60
CD160	protein_coding	73.0941	1.8036	0.110522	16.3189	7.24452e-60
TIGIT	protein_coding	384.314	2.88555	0.17685	16.3164	7.54188e-60
TESPA1	protein_coding	275.016	2.38404	0.146189	16.3079	8.66841e-60
SAMD14	protein_coding	474.463	1.61865	0.0993315	16.2955	1.06289e-59
HLA-DQA1	protein_coding	15119.8	2.19533	0.134745	16.2925	1.11647e-59
FKBP11	protein_coding	1420.48	1.96951	0.120888	16.2921	1.12353e-59
FOXM1	protein_coding	607.776	2.4402	0.149784	16.2915	1.13483e-59
ENOX1	protein_coding	140.96	-1.93699	0.118906	-16.29	1.16199e-59
TMEM44	protein_coding	1277.23	1.81383	0.111356	16.2886	1.18965e-59
TNFRSF1B	protein_coding	4516.1	1.42863	0.0878169	16.2683	1.65707e-59
RACK1	protein_coding	91376.1	1.21463	0.0746694	16.2667	1.7005e-59
RAB24	protein_coding	806.153	1.66632	0.10247	16.2616	1.8497e-59
APOBEC3F	protein_coding	466.398	1.10845	0.068183	16.257	1.99415e-59
LPXN	protein_coding	1316.62	1.3173	0.0810316	16.2566	2.0063e-59
CA8	protein_coding	346.62	-3.29439	0.20269	-16.2534	2.11435e-59
SH2B3	protein_coding	5323.65	1.28151	0.0788602	16.2504	2.21985e-59
IKZF1	protein_coding	1428.41	2.04988	0.126248	16.237	2.76294e-59
LIMD2	protein_coding	1287.85	2.01338	0.124074	16.2273	3.23517e-59
CAMK1D	protein_coding	1678.85	1.25983	0.0776637	16.2216	3.5483e-59
SUCLG2	protein_coding	4694.43	-1.29175	0.0796535	-16.2171	3.81596e-59
TICRR	protein_coding	108.681	2.28806	0.141091	16.2169	3.83068e-59
SLAMF6	protein_coding	525.713	2.5212	0.155644	16.1985	5.16574e-59
KIFC1	protein_coding	321.638	1.96692	0.121435	16.1973	5.27109e-59
GABRE	protein_coding	1486.92	2.93043	0.180992	16.1909	5.84477e-59
RAD54L	protein_coding	159.399	2.4484	0.151344	16.1778	7.23866e-59
SH3BP1	protein_coding	695.259	1.6565	0.102431	16.1719	7.9618e-59
RASSF4	protein_coding	10859.4	1.68399	0.104175	16.1651	8.88422e-59
CLK4	protein_coding	2170.57	1.47222	0.0911269	16.1557	1.03567e-58
MTFP1	protein_coding	782.07	1.65156	0.102323	16.1408	1.31902e-58
PILRA	protein_coding	685.618	1.64878	0.10216	16.1392	1.35268e-58
LPIN2	protein_coding	4479.61	-1.0527	0.0652278	-16.1388	1.36149e-58
CDHR1	protein_coding	1574.04	4.20536	0.260687	16.1319	1.52332e-58
RALGDS	protein_coding	3479.15	1.12273	0.0695998	16.1313	1.53832e-58
RNF175	protein_coding	101.892	2.3977	0.14872	16.1223	1.77871e-58
CTSS	protein_coding	9254.22	1.92786	0.119616	16.1171	1.93558e-58
TOP2A	protein_coding	1301.12	2.32214	0.144115	16.1131	2.06374e-58
TSPAN32	protein_coding	124.912	2.01109	0.12484	16.1094	2.19182e-58
P2RY8	protein_coding	1776.75	1.83797	0.1141	16.1084	2.2259e-58
PIEZO2	protein_coding	1763.93	2.12757	0.132103	16.1054	2.33822e-58
LRRC25	protein_coding	1045.13	2.3021	0.142939	16.1054	2.33643e-58
CKLF	protein_coding	368.307	1.09265	0.0678484	16.1043	2.38131e-58
FPR3	protein_coding	2030.29	2.18556	0.135728	16.1025	2.45097e-58
COL4A1	protein_coding	75866.8	1.87012	0.11616	16.0996	2.56962e-58
MMP9	protein_coding	1396.69	3.78547	0.235283	16.089	3.0466e-58
TSPYL4	protein_coding	2134.87	-1.07129	0.0665978	-16.086	3.19686e-58
SPTBN2	protein_coding	2802.35	-4.35616	0.270824	-16.0849	3.25765e-58
FDX1	protein_coding	1668.12	-1.1275	0.0701195	-16.0798	3.53766e-58
EME1	protein_coding	87.3346	2.09757	0.130455	16.0789	3.58441e-58
SLC35G2	protein_coding	624.647	1.41512	0.0880477	16.0722	3.99851e-58
PCED1B	protein_coding	535.668	1.6981	0.105666	16.0704	4.11706e-58
SIRPB1	protein_coding	356.389	2.67503	0.166515	16.0648	4.5e-58
FAM193B	protein_coding	2619.11	2.1063	0.131241	16.0491	5.79811e-58
E2F8	protein_coding	114.576	2.64045	0.1646	16.0417	6.53786e-58
BTBD19	protein_coding	683.204	1.91634	0.119512	16.0347	7.31641e-58
EVI2B	protein_coding	1427.17	1.9457	0.121433	16.0229	8.84741e-58
SERPINB9	protein_coding	1962.53	1.34647	0.0840694	16.0162	9.85612e-58
MEFV	protein_coding	114.346	2.2486	0.140447	16.0103	1.08242e-57
SMPDL3A	protein_coding	5808.64	1.79252	0.11211	15.9889	1.52675e-57
PLXNB1	protein_coding	4897.54	-1.42393	0.0890801	-15.9848	1.63111e-57
CDC6	protein_coding	292.265	2.00037	0.12515	15.9838	1.65841e-57
RASSF5	protein_coding	1691.7	1.69883	0.106285	15.9838	1.65795e-57
AC040162.1	protein_coding	154.602	2.09989	0.131427	15.9776	1.82968e-57
BNIP3	protein_coding	14143.1	1.53469	0.0960575	15.9768	1.85406e-57
DACH1	protein_coding	603.702	-2.37988	0.149057	-15.9663	2.19485e-57
LRRC37B	protein_coding	391.259	1.02399	0.0641387	15.9653	2.22989e-57
ITGAM	protein_coding	1444.72	1.99218	0.124799	15.9632	2.30761e-57
SLC6A1	protein_coding	464.713	2.28432	0.14313	15.9598	2.43667e-57
CD74	protein_coding	242990	1.75843	0.110219	15.9539	2.67518e-57
TBX19	protein_coding	287.06	1.57437	0.098728	15.9466	3.01006e-57
TAGAP	protein_coding	670.348	1.93361	0.121364	15.9323	3.78097e-57
MBOAT2	protein_coding	1397.78	-1.57413	0.0988071	-15.9314	3.83752e-57
PAQR5	protein_coding	3376.94	-1.79064	0.112409	-15.9296	3.94998e-57
CCM2	protein_coding	2978.16	1.13099	0.0710111	15.927	4.11578e-57
PDCD1	protein_coding	289.732	3.32765	0.208932	15.927	4.11692e-57
C17orf53	protein_coding	122.541	1.55143	0.0974499	15.9203	4.58335e-57
BIRC5	protein_coding	446.776	2.49434	0.156684	15.9196	4.63477e-57
MMP11	protein_coding	1029.06	2.04185	0.128307	15.9138	5.08415e-57
HLA-DMA	protein_coding	7908.56	1.4988	0.094258	15.901	6.23473e-57
TMEM233	protein_coding	429.139	2.07352	0.130409	15.9002	6.31877e-57
ACAP1	protein_coding	926.901	1.85041	0.116431	15.8927	7.1172e-57
ARHGEF3	protein_coding	2311.74	-1.09136	0.0686977	-15.8865	7.86121e-57
DYNLL2	protein_coding	8107.18	-1.0108	0.0636354	-15.8842	8.15179e-57
PAQR4	protein_coding	391.982	1.7498	0.110167	15.8832	8.28962e-57
RAC2	protein_coding	2337.44	2.09241	0.131815	15.8738	9.61753e-57
PYCARD	protein_coding	915.556	2.08368	0.131342	15.8645	1.11536e-56
HLA-DQB2	protein_coding	1817.89	2.81242	0.177326	15.8601	1.1963e-56
SLC29A4	protein_coding	2622.35	2.19968	0.138695	15.8599	1.20128e-56
NDUFS1	protein_coding	7379.5	-1.20987	0.0762875	-15.8593	1.21237e-56
BCAM	protein_coding	17369	-1.67979	0.10593	-15.8575	1.24711e-56
LILRA2	protein_coding	270.251	1.89511	0.119508	15.8576	1.24627e-56
FAM151A	protein_coding	1274.44	-3.96209	0.249908	-15.8542	1.31456e-56
SIT1	protein_coding	244.9	2.70317	0.170523	15.8522	1.35637e-56
IKZF3	protein_coding	1015.85	2.53682	0.160032	15.852	1.36229e-56
CD3G	protein_coding	420.124	2.54131	0.160322	15.8513	1.37657e-56
CMTM4	protein_coding	4656.61	-1.92116	0.121258	-15.8436	1.55617e-56
SH2D5	protein_coding	125.949	2.47783	0.156437	15.8391	1.6707e-56
ALDOC	protein_coding	5083.69	2.29432	0.144944	15.829	1.96306e-56
PRR7	protein_coding	169.091	2.39556	0.151366	15.8264	2.04755e-56
PCDHB10	protein_coding	362.868	1.71503	0.10846	15.8125	2.5508e-56
VWA8	protein_coding	2072.64	-1.18109	0.0747245	-15.8059	2.83156e-56
SLC52A3	protein_coding	365.525	-2.95128	0.186787	-15.8002	3.10177e-56
VSIR	protein_coding	4735.97	1.19532	0.0756657	15.7973	3.24536e-56
CDKN2B	protein_coding	746.667	1.68655	0.106798	15.7919	3.53785e-56
NRG3	protein_coding	333.147	1.92913	0.122207	15.7857	3.90135e-56
JAG2	protein_coding	2670.53	1.67158	0.105922	15.7812	4.19194e-56
SGPP1	protein_coding	2238.05	-1.2796	0.0811079	-15.7765	4.51378e-56
SEL1L3	protein_coding	8858.04	1.66236	0.105391	15.7733	4.75016e-56
MB21D1	protein_coding	337.505	1.3827	0.0877209	15.7624	5.64085e-56
IPO13	protein_coding	2508.44	-1.04778	0.0664799	-15.7608	5.79157e-56
PLAT	protein_coding	3798.9	-1.78093	0.113104	-15.7459	7.32793e-56
CENPH	protein_coding	255.16	1.37625	0.0874047	15.7457	7.35095e-56
CDCA7L	protein_coding	1134.88	1.75812	0.111673	15.7435	7.614e-56
GATA3	protein_coding	1063.09	-3.10275	0.197093	-15.7426	7.72186e-56
ABCA1	protein_coding	6605.44	1.52628	0.0970733	15.723	1.05261e-55
CKAP2L	protein_coding	168.99	2.24947	0.143104	15.7191	1.11888e-55
RIN1	protein_coding	565.43	2.05955	0.131037	15.7174	1.15032e-55
SCIMP	protein_coding	422.616	1.94666	0.12391	15.7102	1.28789e-55
BCL2A1	protein_coding	251.737	2.5794	0.164244	15.7046	1.40561e-55
GPR65	protein_coding	552.194	1.87855	0.119664	15.6986	1.54732e-55
HSPA6	protein_coding	311.444	1.91523	0.122018	15.6963	1.60418e-55
UBE2C	protein_coding	418.958	2.96409	0.188883	15.6927	1.69647e-55
S1PR4	protein_coding	233.232	1.82928	0.116604	15.6879	1.82973e-55
MAPK8IP3	protein_coding	3871.59	2.09011	0.133244	15.6863	1.87669e-55
SRL	protein_coding	169.804	-1.88828	0.120444	-15.6776	2.15281e-55
PLVAP	protein_coding	43714.2	1.94867	0.124331	15.6733	2.3038e-55
HOXB6	protein_coding	819.85	-2.09595	0.133889	-15.6543	3.1045e-55
STAB1	protein_coding	8285.65	1.68638	0.107767	15.6483	3.41112e-55
ACADM	protein_coding	5736.5	-1.54173	0.0985737	-15.6404	3.86179e-55
KCNJ12	protein_coding	189.241	-2.32305	0.148733	-15.6189	5.41059e-55
UNC5B	protein_coding	6391.98	1.75309	0.112256	15.6169	5.58182e-55
SHC1	protein_coding	8837.88	1.0795	0.069125	15.6166	5.60911e-55
RGS10	protein_coding	1259.16	1.6175	0.103592	15.6141	5.83619e-55
TMEM2	protein_coding	7230.42	1.22575	0.0785151	15.6116	6.06705e-55
PIMREG	protein_coding	117.378	2.31787	0.148534	15.605	6.72643e-55
ALDOA	protein_coding	115051	1.11259	0.0713118	15.6017	7.08388e-55
MICAL1	protein_coding	2457.6	1.4756	0.0946518	15.5898	8.53889e-55
RHOH	protein_coding	379.298	2.20468	0.141457	15.5856	9.12449e-55
IL15RA	protein_coding	1147.03	1.47627	0.0947618	15.5788	1.01514e-54
PTPN22	protein_coding	320.254	2.03274	0.130502	15.5763	1.05448e-54
CD52	protein_coding	1331.93	2.11711	0.135973	15.5701	1.16225e-54
GZMM	protein_coding	130.078	2.09472	0.134552	15.5681	1.19863e-54
TENM1	protein_coding	1353.63	2.42678	0.155906	15.5657	1.24498e-54
KCTD1	protein_coding	929.932	-1.98984	0.127857	-15.5631	1.2976e-54
AIM2	protein_coding	135.645	3.04683	0.195922	15.5512	1.56091e-54
CORO1C	protein_coding	9647.16	1.06068	0.0682327	15.5451	1.71878e-54
RGL4	protein_coding	90.6042	1.88266	0.121155	15.5392	1.88361e-54
PDE1B	protein_coding	989.034	1.65112	0.106279	15.5357	1.9883e-54
FDXR	protein_coding	1542.82	1.41214	0.0909248	15.5308	2.14577e-54
P3H1	protein_coding	2391.6	1.33502	0.0859783	15.5274	2.26224e-54
DHRS11	protein_coding	509.65	-1.42902	0.0920323	-15.5273	2.26606e-54
SEZ6L2	protein_coding	4518.91	2.29474	0.147866	15.519	2.57965e-54
PCCB	protein_coding	2261.11	-1.6663	0.107392	-15.5161	2.70049e-54
AKNA	protein_coding	2638.08	1.45403	0.0937169	15.5151	2.74122e-54
SIGLEC7	protein_coding	185.419	2.11918	0.136737	15.4982	3.56751e-54
NMB	protein_coding	1453.72	2.58751	0.166957	15.4981	3.57519e-54
CEACAM21	protein_coding	123.667	1.85581	0.119754	15.4969	3.63838e-54
TBC1D4	protein_coding	3888.92	-1.51152	0.0975377	-15.4967	3.64979e-54
FANCI	protein_coding	748.118	1.27872	0.08252	15.4958	3.70192e-54
HLA-DRA	protein_coding	77813.9	1.71895	0.11093	15.4958	3.70413e-54
C3AR1	protein_coding	1419.9	1.88144	0.12142	15.4953	3.73132e-54
BMP6	protein_coding	736.333	-2.115	0.136507	-15.4937	3.82554e-54
AQP3	protein_coding	9552.66	-2.19788	0.14188	-15.4912	3.98022e-54
NPIPB5	protein_coding	269.418	2.95883	0.191093	15.4837	4.46929e-54
LARS2	protein_coding	1212.92	-1.41685	0.0915549	-15.4754	5.08786e-54
2020-03-03	protein_coding	237.564	1.43829	0.0930075	15.4642	6.04791e-54
HLA-DPA1	protein_coding	36519.6	1.83774	0.118861	15.4613	6.32919e-54
MAP3K7CL	protein_coding	1814.59	2.12153	0.137275	15.4546	7.02661e-54
TRIM22	protein_coding	5642.5	1.34927	0.087324	15.4513	7.38937e-54
ESRRG	protein_coding	1427.72	-3.08811	0.200071	-15.4351	9.50616e-54
ARHGEF6	protein_coding	2719.51	1.14177	0.0739908	15.4312	1.0093e-53
ACTRT3	protein_coding	100.465	-1.76612	0.114499	-15.4247	1.11617e-53
GGACT	protein_coding	705.606	-2.38929	0.154948	-15.4199	1.20228e-53
CD99	protein_coding	9865.6	1.28147	0.083114	15.4182	1.23432e-53
OAS1	protein_coding	3580.61	1.43743	0.0932634	15.4126	1.34752e-53
ADAMTS10	protein_coding	983.809	2.16982	0.140797	15.411	1.38164e-53
OAT	protein_coding	3404.7	-1.20847	0.0784233	-15.4095	1.41222e-53
ADAMTSL4	protein_coding	1106.52	2.1063	0.136708	15.4073	1.46171e-53
MT1G	protein_coding	3976.99	-4.43781	0.288076	-15.405	1.51467e-53
ABCG1	protein_coding	3999.48	1.2793	0.0830666	15.4009	1.614e-53
PROCR	protein_coding	2117.81	1.60162	0.104063	15.3909	1.88329e-53
OGFR	protein_coding	3250.47	1.05753	0.0687743	15.3768	2.34212e-53
MMP16	protein_coding	328.719	2.71743	0.176817	15.3686	2.6579e-53
PLD4	protein_coding	672.594	2.25954	0.14705	15.3659	2.77337e-53
SH3GL1	protein_coding	5272.87	1.05224	0.0685179	15.3572	3.17022e-53
RAPGEF3	protein_coding	2018.33	-1.74875	0.113903	-15.3529	3.38763e-53
NCF2	protein_coding	1084.2	1.73866	0.113341	15.3401	4.12449e-53
PEBP1	protein_coding	34972.7	-1.19451	0.0778845	-15.337	4.32873e-53
TSPAN4	protein_coding	5486.07	1.20917	0.0788755	15.3301	4.81548e-53
P4HA3	protein_coding	455.452	2.85874	0.186636	15.3172	5.86872e-53
COL5A2	protein_coding	6369.36	2.06839	0.135039	15.317	5.89034e-53
ICAM3	protein_coding	156.997	1.97643	0.129054	15.3147	6.09697e-53
2020-09-05	protein_coding	1072.1	1.71728	0.112219	15.303	7.30062e-53
FJX1	protein_coding	861.84	1.51903	0.0992887	15.2992	7.74283e-53
GNA15	protein_coding	408.958	1.74951	0.114409	15.2917	8.68236e-53
TRIP13	protein_coding	301.796	1.78331	0.116667	15.2855	9.55509e-53
PRRT2	protein_coding	216.783	2.42782	0.158967	15.2725	1.16566e-52
CDKL1	protein_coding	451.404	-1.5889	0.104074	-15.267	1.26893e-52
NCAPH	protein_coding	172.642	1.93929	0.127124	15.2551	1.52203e-52
PDHA1	protein_coding	5197.16	-1.15979	0.0760391	-15.2525	1.58395e-52
CAND2	protein_coding	216.901	-1.82344	0.119556	-15.2517	1.6043e-52
EIF4A1	protein_coding	521.3	2.11615	0.138765	15.2499	1.64928e-52
AFAP1L1	protein_coding	2448.56	1.47145	0.0964992	15.2484	1.68809e-52
PCCA	protein_coding	3145.98	-1.49491	0.0981048	-15.2379	1.98176e-52
SSC4D	protein_coding	155.236	-2.23491	0.146687	-15.2358	2.04501e-52
ARHGEF1	protein_coding	4954.33	1.18118	0.0775444	15.2323	2.159e-52
FGR	protein_coding	1070.5	1.52013	0.0998014	15.2315	2.18363e-52
AP3S1	protein_coding	3068.82	1.02962	0.0676104	15.2288	2.27828e-52
KIAA1161	protein_coding	1475.6	-1.53652	0.10091	-15.2266	2.35531e-52
STMN3	protein_coding	4173.61	2.16092	0.141954	15.2227	2.49974e-52
TNK2	protein_coding	2183.11	1.39081	0.0913915	15.2181	2.68083e-52
PCDH17	protein_coding	2775.96	1.98168	0.130255	15.2139	2.85997e-52
IL32	protein_coding	14811	1.98869	0.130761	15.2086	3.10229e-52
GRAMD4	protein_coding	4889.02	1.75672	0.11554	15.2045	3.30185e-52
FBP1	protein_coding	3709.73	-2.34675	0.154355	-15.2036	3.34614e-52
PRRG1	protein_coding	1319.89	-1.30059	0.0855688	-15.1994	3.56877e-52
SLC17A4	protein_coding	2849.43	3.57922	0.235543	15.1956	3.77968e-52
DEPDC1	protein_coding	151.668	2.38905	0.15727	15.1907	4.07373e-52
RASD1	protein_coding	3375.08	-2.52757	0.166389	-15.1907	4.07299e-52
RHOG	protein_coding	3087.12	1.02252	0.0673497	15.1822	4.63988e-52
GIMAP4	protein_coding	4773.48	1.29907	0.0855682	15.1817	4.67673e-52
TNIP1	protein_coding	24020.9	1.04693	0.0689608	15.1816	4.68294e-52
CTHRC1	protein_coding	1582.36	3.16374	0.208452	15.1773	4.9987e-52
EVI2A	protein_coding	812.012	1.86246	0.122805	15.166	5.94311e-52
IRF7	protein_coding	1560.36	1.77711	0.117245	15.1572	6.78701e-52
MSR1	protein_coding	3407.82	2.04947	0.135239	15.1544	7.08834e-52
UBE2L6	protein_coding	6454.81	1.1107	0.0733202	15.1486	7.74219e-52
DUSP4	protein_coding	988.783	1.86995	0.123449	15.1476	7.86221e-52
TRAM1L1	protein_coding	350.981	-1.50244	0.0992652	-15.1356	9.43303e-52
ATP1B1	protein_coding	66280.3	-1.36522	0.0902228	-15.1316	1.00156e-51
SAT2	protein_coding	3148.44	-1.14083	0.0754132	-15.1277	1.06382e-51
NRP2	protein_coding	4537.26	1.68941	0.111682	15.127	1.07542e-51
CBLN3	protein_coding	493.584	1.64615	0.10886	15.1218	1.16352e-51
TCIRG1	protein_coding	3157.2	1.49901	0.099179	15.1142	1.30592e-51
DCXR	protein_coding	2487.22	-2.062	0.136452	-15.1115	1.35959e-51
RAP2B	protein_coding	2692.16	1.16787	0.0772933	15.1096	1.4009e-51
SIX1	protein_coding	129.406	2.42636	0.160715	15.0973	1.68782e-51
UBAP1L	protein_coding	311.921	2.13706	0.141574	15.0951	1.74524e-51
PXDC1	protein_coding	3642.22	1.17734	0.0780092	15.0923	1.81992e-51
FABP5	protein_coding	579.513	1.93818	0.12847	15.0866	1.98285e-51
CCDC160	protein_coding	145.196	-2.39606	0.158846	-15.0841	2.0591e-51
KIF20A	protein_coding	413.108	2.36938	0.157107	15.0813	2.15054e-51
SH2D1A	protein_coding	273.03	2.46994	0.163887	15.0709	2.51518e-51
HLA-DRB1	protein_coding	44492.1	1.6225	0.10774	15.0594	2.99683e-51
SIPA1	protein_coding	3169.63	1.11009	0.0737587	15.0502	3.43995e-51
FLT1	protein_coding	29400.7	1.8646	0.123918	15.0471	3.60598e-51
TAP2	protein_coding	2448.52	1.14058	0.0758278	15.0418	3.90999e-51
RAPGEFL1	protein_coding	346.137	1.78733	0.11884	15.0397	4.0309e-51
CARMIL2	protein_coding	206.84	2.51888	0.167487	15.0393	4.05897e-51
NBPF15	protein_coding	849.198	1.22603	0.081554	15.0333	4.4424e-51
RDH10	protein_coding	3125.75	-1.65316	0.109978	-15.0317	4.54969e-51
AHSA2	protein_coding	2572.4	2.08822	0.138931	15.0307	4.62164e-51
RPS19	protein_coding	42042.9	1.4951	0.099514	15.024	5.10927e-51
RAD51	protein_coding	135.705	1.60028	0.106551	15.0189	5.51983e-51
CXCL13	protein_coding	375.849	4.21331	0.280645	15.013	6.03923e-51
FAM110A	protein_coding	658.016	1.13759	0.075782	15.0113	6.1915e-51
AC023509.3	protein_coding	104.854	2.32098	0.154721	15.0011	7.22411e-51
IFI44	protein_coding	1710.36	1.54196	0.102879	14.988	8.79141e-51
ECI2	protein_coding	4472.07	-1.06606	0.0711526	-14.9827	9.53138e-51
POPDC2	protein_coding	545.244	1.57983	0.10546	14.9804	9.86871e-51
PADI2	protein_coding	1366.37	-2.47064	0.164942	-14.9789	1.00889e-50
ECHS1	protein_coding	10630.5	-1.31631	0.0878817	-14.9783	1.01859e-50
CD180	protein_coding	423.68	2.11545	0.141343	14.9668	1.21095e-50
ATG9B	protein_coding	288.671	2.94797	0.196984	14.9655	1.23304e-50
ADSSL1	protein_coding	4226.35	2.46479	0.164697	14.9655	1.23321e-50
TACC3	protein_coding	1024.54	1.46904	0.0981641	14.9651	1.24104e-50
WASF3	protein_coding	649.934	-1.57375	0.105161	-14.9651	1.24093e-50
EXOSC5	protein_coding	1185.07	1.32772	0.088739	14.962	1.29981e-50
GRB10	protein_coding	9898.28	1.42684	0.0954226	14.9528	1.49291e-50
AXL	protein_coding	6846.87	1.58761	0.106178	14.9523	1.5052e-50
GALNT3	protein_coding	602.932	-2.58181	0.172684	-14.9511	1.5331e-50
RTP4	protein_coding	915.646	1.72905	0.115672	14.9478	1.60888e-50
BHLHB9	protein_coding	411.083	-1.0942	0.0732091	-14.9462	1.64953e-50
ALKBH6	protein_coding	154.979	1.68502	0.11276	14.9434	1.72065e-50
ACOX2	protein_coding	951.616	-1.90024	0.12717	-14.9426	1.74179e-50
DYSF	protein_coding	8606.26	1.47303	0.0985877	14.9413	1.77485e-50
CGN	protein_coding	1481.39	-2.44525	0.16367	-14.9401	1.80757e-50
TRIM59	protein_coding	374.298	1.15614	0.077469	14.9238	2.30582e-50
MPPED2	protein_coding	423.416	-2.55506	0.171308	-14.915	2.63416e-50
PAQR6	protein_coding	187.089	2.61172	0.175124	14.9135	2.69196e-50
COL6A2	protein_coding	26423.4	1.98016	0.132931	14.8962	3.48885e-50
NLGN1	protein_coding	1901.01	2.00691	0.134814	14.8865	4.0348e-50
SLC43A3	protein_coding	1938.29	1.61181	0.108297	14.8832	4.23616e-50
MICB	protein_coding	355.155	1.29861	0.0872596	14.8822	4.30093e-50
TRMT1	protein_coding	1669.48	1.17788	0.079151	14.8814	4.35354e-50
NFKBID	protein_coding	461.492	2.18103	0.146577	14.8798	4.45618e-50
IL4I1	protein_coding	920.683	2.12845	0.143087	14.8752	4.77532e-50
RAP1GAP	protein_coding	4820.2	-2.57866	0.173355	-14.8751	4.78528e-50
AGER	protein_coding	349.134	2.09341	0.140758	14.8723	4.98419e-50
NMI	protein_coding	1443.12	1.02056	0.0686243	14.8717	5.02884e-50
SLA	protein_coding	2146.4	1.75986	0.118342	14.8709	5.09239e-50
LINGO1	protein_coding	1059.38	1.9603	0.131827	14.8703	5.14025e-50
LCP1	protein_coding	8924.18	1.81186	0.121959	14.8563	6.32836e-50
ACOT11	protein_coding	795.74	-2.02548	0.136356	-14.8544	6.51769e-50
MYH10	protein_coding	6258.26	-1.74762	0.117656	-14.8537	6.58135e-50
POLQ	protein_coding	104.457	2.13687	0.143866	14.8532	6.63098e-50
SLC13A3	protein_coding	4220.13	-4.6788	0.315063	-14.8504	6.91954e-50
CMTM3	protein_coding	2608.87	1.52306	0.102613	14.8428	7.74652e-50
TMEM72	protein_coding	2608.02	-3.02579	0.203993	-14.8328	8.99095e-50
ANKZF1	protein_coding	2616.8	1.45527	0.0981299	14.83	9.36785e-50
TRAF3IP2	protein_coding	2467.91	1.05691	0.0712691	14.8298	9.40153e-50
IFI30	protein_coding	127.073	2.32833	0.157063	14.8241	1.02285e-49
C16orf74	protein_coding	498.708	3.09427	0.208756	14.8224	1.04944e-49
SLC9A3	protein_coding	1835.27	-3.50932	0.236809	-14.8192	1.10032e-49
RELB	protein_coding	1482.62	1.12084	0.0756509	14.816	1.15514e-49
RALGPS1	protein_coding	559.861	-1.98681	0.134106	-14.8153	1.16693e-49
SYNE2	protein_coding	13225.2	-1.23137	0.0831156	-14.8151	1.16952e-49
CD5	protein_coding	463.435	2.11208	0.142589	14.8124	1.21902e-49
KCNQ1	protein_coding	1905.32	-1.87333	0.126496	-14.8093	1.27512e-49
MKI67	protein_coding	1261.68	2.21971	0.14991	14.807	1.32069e-49
CNNM2	protein_coding	1417.13	-1.06469	0.0719384	-14.8	1.46483e-49
MYO5C	protein_coding	1153.09	-1.30605	0.0882755	-14.7951	1.57478e-49
BRIP1	protein_coding	179.133	1.79068	0.121077	14.7896	1.71093e-49
EXOC3L1	protein_coding	932.382	1.52133	0.102866	14.7894	1.71365e-49
THRB	protein_coding	1093.42	-1.95128	0.13211	-14.7701	2.28313e-49
PAQR8	protein_coding	1041.84	-1.35444	0.0917058	-14.7694	2.3074e-49
IL3RA	protein_coding	1260.43	1.44884	0.0981242	14.7653	2.45071e-49
ALDOB	protein_coding	38628.3	-4.71867	0.319652	-14.7619	2.57882e-49
KIAA0319	protein_coding	137.247	2.8248	0.191392	14.7593	2.68111e-49
PLEKHG4	protein_coding	944.444	2.12282	0.143974	14.7444	3.34038e-49
NGF	protein_coding	423.155	2.13759	0.14498	14.744	3.36478e-49
FDFT1	protein_coding	3905.35	-1.01399	0.0687867	-14.741	3.51514e-49
DDX41	protein_coding	6357.14	1.04619	0.0709916	14.7368	3.74164e-49
GPM6B	protein_coding	385.273	-2.16154	0.14668	-14.7364	3.76384e-49
MS4A4A	protein_coding	1330.56	1.90996	0.129692	14.7268	4.33578e-49
CGNL1	protein_coding	8389.98	-2.14476	0.14574	-14.7163	5.06264e-49
PIPOX	protein_coding	1584.14	-2.97009	0.201869	-14.7129	5.32588e-49
TRAF2	protein_coding	1196.03	1.04017	0.0707128	14.7097	5.58316e-49
B3GNTL1	protein_coding	272.837	1.33809	0.0909923	14.7055	5.94341e-49
HHLA2	protein_coding	3716.55	3.126	0.212601	14.7036	6.10996e-49
SLC41A2	protein_coding	2279.32	1.20245	0.0817793	14.7035	6.11725e-49
ZDHHC2	protein_coding	2641.21	-1.84276	0.125368	-14.6989	6.55234e-49
MCUB	protein_coding	639.973	1.63066	0.110963	14.6955	6.88502e-49
NLRC3	protein_coding	617.113	1.29766	0.0883606	14.6859	7.93615e-49
NR3C2	protein_coding	1418.27	-2.06282	0.140479	-14.6842	8.14314e-49
GJA1	protein_coding	9645.28	1.76095	0.119959	14.6796	8.71135e-49
PLAU	protein_coding	3900.11	-2.15082	0.146523	-14.6791	8.77753e-49
CTDSPL	protein_coding	4164.84	-1.2159	0.0828563	-14.6747	9.35643e-49
ARHGAP33	protein_coding	649.605	2.11125	0.143896	14.672	9.73593e-49
MMP14	protein_coding	15228	1.46181	0.0996823	14.6647	1.0854e-48
ANO1	protein_coding	2956.94	1.83253	0.124967	14.6641	1.09515e-48
COL4A5	protein_coding	930.762	-2.3265	0.158669	-14.6626	1.11915e-48
SEC61G	protein_coding	3128.79	1.12936	0.0770476	14.6579	1.19869e-48
GCDH	protein_coding	1111.73	-1.05795	0.0721831	-14.6564	1.22584e-48
ABLIM3	protein_coding	6936.25	1.97341	0.134684	14.6522	1.30443e-48
CCDC141	protein_coding	105.673	1.9324	0.131931	14.647	1.40743e-48
E2F7	protein_coding	110.146	2.43057	0.165952	14.6462	1.42544e-48
LYZ	protein_coding	10486	2.442	0.166803	14.64	1.5602e-48
HSD17B7	protein_coding	770.274	1.64314	0.112319	14.6292	1.82987e-48
AP5M1	protein_coding	2649	-1.10111	0.0753176	-14.6195	2.10916e-48
PBK	protein_coding	151.192	2.10892	0.144295	14.6153	2.24215e-48
NPIPB4	protein_coding	164.321	1.93496	0.132395	14.615	2.25262e-48
GRK5	protein_coding	1597.01	1.25394	0.0858058	14.6137	2.29796e-48
DLK2	protein_coding	120.168	2.349	0.160786	14.6095	2.44423e-48
LY6G5B	protein_coding	146.71	2.35336	0.161121	14.6061	2.56747e-48
CD14	protein_coding	6475.41	1.76089	0.12056	14.6059	2.57612e-48
DOCK10	protein_coding	1963.2	1.36281	0.0933359	14.6011	2.76297e-48
ITGA4	protein_coding	1764.83	1.70535	0.116845	14.595	3.02238e-48
SLC2A3	protein_coding	7493.65	2.02968	0.139079	14.5937	3.08127e-48
LOXL3	protein_coding	438.847	1.45317	0.0995774	14.5934	3.09612e-48
FMO4	protein_coding	910.751	-1.38922	0.0952704	-14.5819	3.66151e-48
ESCO2	protein_coding	88.8719	1.88333	0.129186	14.5785	3.85111e-48
MNDA	protein_coding	921.709	1.78355	0.122375	14.5745	4.08222e-48
SPATA18	protein_coding	2634.38	1.66622	0.114337	14.5729	4.17963e-48
ZNF692	protein_coding	1128.07	1.82954	0.125604	14.566	4.62458e-48
CRYGS	protein_coding	147.745	2.10402	0.144523	14.5584	5.16365e-48
NOP16	protein_coding	1004.1	1.12567	0.0773373	14.5554	5.39878e-48
GNAI1	protein_coding	3063.07	-1.22619	0.0842455	-14.555	5.4279e-48
CD48	protein_coding	1313.89	1.94623	0.133722	14.5543	5.48073e-48
MYBL1	protein_coding	442.037	1.74264	0.119749	14.5524	5.63928e-48
SLC9A5	protein_coding	112.662	1.76056	0.120982	14.5523	5.65068e-48
TLR6	protein_coding	234.469	1.69864	0.116726	14.5523	5.64791e-48
PDGFD	protein_coding	5302.71	1.83418	0.126154	14.5392	6.83563e-48
PHLDA3	protein_coding	3260.67	1.66816	0.114801	14.5309	7.7214e-48
APEH	protein_coding	4619.41	-1.22698	0.0844742	-14.5249	8.42399e-48
RIT1	protein_coding	4470.55	1.08498	0.074704	14.5238	8.56568e-48
RAB33A	protein_coding	105.191	2.1582	0.148644	14.5192	9.15439e-48
ANLN	protein_coding	670.785	2.31333	0.159414	14.5115	1.02498e-47
TNFSF8	protein_coding	261.752	1.81627	0.12518	14.5093	1.05855e-47
FLI1	protein_coding	2617.13	1.1989	0.0826323	14.5088	1.06512e-47
SKA1	protein_coding	90.9209	2.14244	0.147718	14.5035	1.15099e-47
FSCN1	protein_coding	5448.83	1.56511	0.107917	14.5028	1.16238e-47
HEY1	protein_coding	1141.94	1.57403	0.108553	14.5001	1.21033e-47
TOX2	protein_coding	537.789	1.71956	0.11863	14.4952	1.29885e-47
POLE2	protein_coding	116.284	1.29992	0.0896937	14.4929	1.34376e-47
ITK	protein_coding	510.527	2.08118	0.143606	14.4923	1.35581e-47
CACNA2D4	protein_coding	408.394	2.08755	0.144061	14.4907	1.38673e-47
NHSL1	protein_coding	1404.51	-1.25513	0.0866381	-14.487	1.46324e-47
TBC1D24	protein_coding	1218.41	-1.37452	0.0948917	-14.4852	1.50329e-47
SPC25	protein_coding	118.636	1.84683	0.127526	14.4819	1.5763e-47
GUCY1B3	protein_coding	3935.03	1.18922	0.0821309	14.4796	1.63056e-47
GPR176	protein_coding	1829.13	1.42583	0.0985374	14.4699	1.87646e-47
PRC1	protein_coding	748.827	1.35313	0.0935242	14.4682	1.92419e-47
TEN1-CDK3	protein_coding	91.3734	2.01593	0.139365	14.4651	2.01424e-47
ARL4D	protein_coding	793.465	-2.68721	0.185805	-14.4625	2.09037e-47
LINC01125	protein_coding	156.402	2.03526	0.140791	14.4559	2.30249e-47
CTNNAL1	protein_coding	1722.33	-1.40888	0.0975129	-14.4482	2.57469e-47
REEP4	protein_coding	842.977	1.154	0.0798824	14.4463	2.6462e-47
POU2F2	protein_coding	679.47	1.96133	0.135794	14.4434	2.75727e-47
SLC9A9	protein_coding	1389.31	1.79695	0.12442	14.4427	2.78885e-47
NADSYN1	protein_coding	3763.27	1.05943	0.0733838	14.4368	3.03662e-47
HSPB7	protein_coding	681.977	-3.28849	0.227922	-14.4281	3.44293e-47
APOBR	protein_coding	723.6	1.69363	0.11739	14.4274	3.47906e-47
MTMR11	protein_coding	3154.21	1.59954	0.110879	14.4259	3.55632e-47
GALM	protein_coding	3495.46	-1.18084	0.0818639	-14.4244	3.63275e-47
COL4A2	protein_coding	67815.2	1.53276	0.106283	14.4214	3.79372e-47
VPS13D	protein_coding	4330.1	-1.06661	0.0739811	-14.4173	4.02791e-47
SLC17A2	protein_coding	242.563	3.29342	0.228508	14.4127	4.30409e-47
FAS	protein_coding	1985.7	1.18622	0.0823213	14.4096	4.50238e-47
PERM1	protein_coding	412.401	3.10453	0.215479	14.4076	4.63649e-47
ABCD3	protein_coding	4507.67	-1.00896	0.070054	-14.4026	4.98469e-47
MAL2	protein_coding	4643.53	-2.75667	0.191413	-14.4017	5.05225e-47
CSRNP3	protein_coding	378.416	-1.63736	0.113725	-14.3975	5.36455e-47
ACAN	protein_coding	2531.8	2.6095	0.181257	14.3967	5.43085e-47
PPARA	protein_coding	3647.67	-1.08444	0.0753402	-14.3939	5.65253e-47
INF2	protein_coding	8751.9	1.30445	0.0906796	14.3853	6.40367e-47
TLR2	protein_coding	1619.33	1.57378	0.109403	14.3851	6.41855e-47
XAF1	protein_coding	820.257	1.93811	0.13474	14.3841	6.51655e-47
APOB	protein_coding	1515.99	4.18099	0.290889	14.3732	7.62543e-47
PRELID3A	protein_coding	104.952	1.61954	0.112718	14.3681	8.20833e-47
ORAI3	protein_coding	1929.89	1.301	0.0906331	14.3546	9.97366e-47
CCL20	protein_coding	1295.32	3.64972	0.254301	14.352	1.03561e-46
ABCD1	protein_coding	1572.39	1.04666	0.0729755	14.3426	1.18531e-46
ZNF831	protein_coding	170.155	2.21915	0.154739	14.3413	1.20807e-46
PSMB10	protein_coding	1928.88	1.38919	0.0968703	14.3408	1.21711e-46
SAMHD1	protein_coding	6789.53	1.40707	0.0981299	14.3388	1.25142e-46
THOC6	protein_coding	1497.81	1.11263	0.0776014	14.3378	1.27041e-46
C8orf4	protein_coding	4058.55	-2.17012	0.151363	-14.3372	1.28082e-46
MAP3K12	protein_coding	959.424	1.33404	0.0930633	14.3347	1.32734e-46
PRR11	protein_coding	347.982	1.8952	0.13222	14.3337	1.34695e-46
WLS	protein_coding	5023.14	-1.47052	0.102636	-14.3276	1.47174e-46
METTL26	protein_coding	4102.41	1.59934	0.11163	14.3271	1.48172e-46
HOXB9	protein_coding	747.861	-3.29928	0.230378	-14.3212	1.61375e-46
HCST	protein_coding	335.228	2.03193	0.141887	14.3208	1.62321e-46
MSH5	protein_coding	243.021	2.17127	0.151663	14.3164	1.72906e-46
TBX3	protein_coding	788.521	-1.8533	0.129468	-14.3147	1.77056e-46
DHRS9	protein_coding	108.584	2.40614	0.168103	14.3135	1.80188e-46
TIMP1	protein_coding	25177.3	2.08528	0.145712	14.311	1.86865e-46
BCAR3	protein_coding	1410.65	-1.01933	0.0712419	-14.308	1.95019e-46
SPACA9	protein_coding	504.807	-1.13249	0.0791666	-14.3051	2.03208e-46
SFXN5	protein_coding	1120.58	-1.25953	0.0881119	-14.2947	2.36274e-46
OSMR	protein_coding	10233.1	1.50999	0.105634	14.2945	2.36701e-46
SH3BGR	protein_coding	279.886	-1.15213	0.0806435	-14.2868	2.64654e-46
RPL10	protein_coding	76328.8	1.05392	0.0737893	14.2828	2.80167e-46
ASAP1	protein_coding	3837.27	1.02595	0.0718635	14.2764	3.07177e-46
SEMA6B	protein_coding	2001.09	1.63298	0.114457	14.2672	3.50375e-46
ATP5S	protein_coding	2067.23	-1.04206	0.0730806	-14.259	3.93801e-46
VAV3	protein_coding	5239.37	-1.40339	0.0984438	-14.2557	4.13087e-46
FRK	protein_coding	2590.98	-1.32331	0.0929224	-14.2411	5.0942e-46
ARID5A	protein_coding	1841.14	1.41056	0.0990813	14.2364	5.44731e-46
PLEKHO2	protein_coding	3905.8	1.03884	0.0730224	14.2263	6.2923e-46
ADAM8	protein_coding	657.612	2.14566	0.150835	14.2252	6.39015e-46
NPIPB3	protein_coding	111.604	2.16242	0.15207	14.2199	6.89261e-46
CCDC142	protein_coding	415.404	1.07596	0.0756846	14.2164	7.25263e-46
PALM	protein_coding	1826.1	-1.5995	0.112517	-14.2156	7.32918e-46
RRM2	protein_coding	769.048	2.17282	0.152868	14.2137	7.53322e-46
JPH4	protein_coding	142.741	-1.62088	0.114133	-14.2017	8.93656e-46
CHL1	protein_coding	906.02	-3.34106	0.235267	-14.2012	9.00964e-46
FAM46B	protein_coding	221.07	-2.56033	0.180303	-14.2002	9.13789e-46
TMEM255B	protein_coding	1091.15	1.52072	0.107104	14.1985	9.3529e-46
LURAP1	protein_coding	148.842	-1.80646	0.127232	-14.1982	9.40114e-46
FCRL3	protein_coding	181.476	2.8	0.197411	14.1836	1.1573e-45
ADAMTS2	protein_coding	1730.41	1.92767	0.135915	14.1829	1.16946e-45
MFAP3L	protein_coding	3331.72	-1.71727	0.121088	-14.182	1.18391e-45
JAML	protein_coding	1039.08	1.67118	0.117894	14.1752	1.30443e-45
SUCLA2	protein_coding	2796.33	-1.04685	0.0739471	-14.1567	1.69833e-45
KCNMA1	protein_coding	3464.07	2.26711	0.160158	14.1554	1.72862e-45
LIN37	protein_coding	208.753	1.01119	0.0714462	14.1531	1.78611e-45
TTK	protein_coding	144.734	1.82619	0.129077	14.1481	1.91935e-45
GAPT	protein_coding	349.154	2.06829	0.146228	14.1443	2.02606e-45
PLXNA3	protein_coding	2327.54	1.35149	0.095583	14.1395	2.1691e-45
HMGCR	protein_coding	2206.65	-1.0449	0.0739129	-14.137	2.24812e-45
MFNG	protein_coding	1393.18	1.20823	0.0855234	14.1275	2.57275e-45
KCTD13	protein_coding	799.05	1.03439	0.0732279	14.1256	2.64058e-45
FANCA	protein_coding	337.047	1.64521	0.1165	14.122	2.78122e-45
GNG7	protein_coding	982.799	-1.40384	0.0994666	-14.1136	3.12998e-45
MAPK10	protein_coding	1078.88	-1.11218	0.0788077	-14.1126	3.17722e-45
TRAF3IP3	protein_coding	538.472	1.83881	0.13038	14.1035	3.61622e-45
CTSH	protein_coding	10269.4	-1.27726	0.0905731	-14.1019	3.69442e-45
ATP6V1H	protein_coding	3326.93	-1.17012	0.0830121	-14.0958	4.0297e-45
GRAP2	protein_coding	217.979	1.66951	0.11849	14.0899	4.38364e-45
LY9	protein_coding	182.394	2.09684	0.148915	14.0808	4.983e-45
LMNTD2	protein_coding	376.757	1.99753	0.142006	14.0665	6.1007e-45
PPM1F	protein_coding	3969.77	1.02993	0.073231	14.0642	6.30586e-45
MAP3K14	protein_coding	2457.16	1.37171	0.0975828	14.0569	6.98664e-45
ZNF205	protein_coding	989.735	1.05392	0.075032	14.0462	8.12481e-45
GBP1	protein_coding	5640.79	1.81211	0.129066	14.0402	8.84736e-45
NUDT1	protein_coding	525.659	1.25592	0.0894558	14.0396	8.927e-45
HOXB5	protein_coding	301.089	-1.93804	0.138077	-14.0359	9.40117e-45
C3orf67	protein_coding	270.282	1.63187	0.116297	14.0319	9.94249e-45
CHEK2	protein_coding	374.72	1.22316	0.0872108	14.0253	1.09093e-44
HMGN5	protein_coding	438.193	-1.09492	0.0780936	-14.0206	1.16666e-44
RPS6KA6	protein_coding	565.395	-3.01341	0.214999	-14.0159	1.24572e-44
RGCC	protein_coding	4729.42	1.5945	0.113789	14.0127	1.30339e-44
SCNN1D	protein_coding	235.186	2.39987	0.171425	13.9996	1.56765e-44
CTSZ	protein_coding	18769.2	1.27763	0.0913582	13.9848	1.92972e-44
DIAPH2	protein_coding	2607.17	1.0983	0.0786028	13.9728	2.28456e-44
CLMN	protein_coding	4030.14	-1.41076	0.100968	-13.9723	2.29933e-44
MALL	protein_coding	262.277	2.06056	0.147504	13.9695	2.39251e-44
RFX2	protein_coding	797.795	1.48115	0.106037	13.9682	2.43629e-44
HTATIP2	protein_coding	2788.78	1.21341	0.0868997	13.9633	2.60906e-44
AP1M2	protein_coding	1323.2	-2.4607	0.176308	-13.9568	2.85825e-44
KCNJ2	protein_coding	1160.43	1.85709	0.133063	13.9564	2.87443e-44
RCSD1	protein_coding	1869.94	1.22074	0.0874716	13.9559	2.89811e-44
MUT	protein_coding	3271.6	-1.08827	0.077987	-13.9545	2.95159e-44
CLDN11	protein_coding	217.875	-2.47709	0.177525	-13.9535	2.99713e-44
PRR16	protein_coding	188.752	1.75441	0.125733	13.9535	2.99739e-44
CD36	protein_coding	8584.41	2.1725	0.155709	13.9523	3.04576e-44
ADCY7	protein_coding	539.395	1.88723	0.135285	13.95	3.14435e-44
NPNT	protein_coding	4420.79	-2.05198	0.147098	-13.9497	3.15728e-44
DDX47	protein_coding	122.017	1.6086	0.115371	13.9428	3.48216e-44
L2HGDH	protein_coding	845.663	-1.44405	0.103574	-13.9421	3.51202e-44
OTOGL	protein_coding	183.863	-2.51587	0.180583	-13.932	4.04977e-44
COL4A3	protein_coding	1674.74	-2.03444	0.146046	-13.9301	4.1568e-44
SCPEP1	protein_coding	4238.31	-1.18091	0.0847839	-13.9285	4.25417e-44
ADAL	protein_coding	575.092	-1.00838	0.0724199	-13.924	4.52536e-44
ALOX5	protein_coding	2486.37	2.08824	0.150113	13.9112	5.41931e-44
TMEM86A	protein_coding	975.045	-1.40866	0.101262	-13.9111	5.42142e-44
C1QL1	protein_coding	1930.67	3.71318	0.267098	13.9019	6.16418e-44
GOLGA8A	protein_coding	1307.81	2.82505	0.203318	13.8948	6.81302e-44
PKD1L1	protein_coding	83.9536	1.7942	0.129157	13.8917	7.11553e-44
CDKN3	protein_coding	150.538	1.90713	0.137288	13.8915	7.13126e-44
PPP1R3B	protein_coding	6902.55	1.31868	0.0949734	13.8847	7.84114e-44
NFKB2	protein_coding	4365.53	1.22732	0.0884111	13.8819	8.154e-44
AGBL3	protein_coding	603.552	1.51057	0.10883	13.8801	8.36161e-44
SLITRK5	protein_coding	399.451	3.41366	0.24594	13.8801	8.36566e-44
CCDC102B	protein_coding	777.212	1.42632	0.102788	13.8764	8.81152e-44
CHN2	protein_coding	519.426	-1.604	0.115644	-13.8702	9.59884e-44
C16orf54	protein_coding	280.379	1.77237	0.127789	13.8695	9.70119e-44
VENTX	protein_coding	102.196	1.92214	0.138605	13.8677	9.94387e-44
POLG2	protein_coding	515.585	1.09289	0.0788358	13.8629	1.06289e-43
LCAT	protein_coding	666.468	1.79823	0.12974	13.8603	1.10287e-43
VWCE	protein_coding	841.863	2.78201	0.20088	13.8491	1.28765e-43
LILRA1	protein_coding	177.08	1.51758	0.109632	13.8425	1.41242e-43
TACSTD2	protein_coding	4673.41	-3.51614	0.254083	-13.8386	1.49158e-43
MCCC1	protein_coding	2270.15	-1.08487	0.0784062	-13.8366	1.53323e-43
JMY	protein_coding	1296.85	-1.23338	0.0891599	-13.8333	1.60486e-43
COL27A1	protein_coding	4269.42	1.75888	0.127163	13.8317	1.64057e-43
HDAC10	protein_coding	476.2	1.53009	0.110647	13.8286	1.71324e-43
FADS3	protein_coding	1848.16	1.33864	0.0968325	13.8243	1.8189e-43
ZNF83	protein_coding	4303.66	1.46385	0.105935	13.8184	1.97308e-43
PRKCQ	protein_coding	624.987	-1.69644	0.122775	-13.8176	1.99746e-43
HIBCH	protein_coding	2669.1	-1.28374	0.0929494	-13.8112	2.18114e-43
CNTNAP1	protein_coding	776.551	1.63961	0.118764	13.8055	2.35966e-43
COL8A1	protein_coding	6229.42	1.97912	0.143443	13.7973	2.64555e-43
DUSP10	protein_coding	518.609	1.38678	0.100563	13.79	2.92557e-43
RUNX1	protein_coding	3705.69	1.76566	0.12805	13.7888	2.97641e-43
COL1A1	protein_coding	60218.4	2.81763	0.204402	13.7847	3.14924e-43
DEGS1	protein_coding	8106.06	1.27207	0.0923119	13.7802	3.3541e-43
SYT7	protein_coding	475.02	-3.36291	0.244361	-13.7621	4.30996e-43
NDRG1	protein_coding	126557	1.33415	0.0969606	13.7597	4.45197e-43
PRPS2	protein_coding	2444.76	-1.02731	0.0746795	-13.7562	4.67164e-43
MARCKS	protein_coding	11245.6	1.09537	0.0796274	13.7562	4.67153e-43
ADGRE2	protein_coding	680.676	1.81739	0.132121	13.7555	4.72017e-43
TMEM245	protein_coding	8116.13	-1.10439	0.0802907	-13.7548	4.76363e-43
PTPRC	protein_coding	4674.54	1.80893	0.131524	13.7536	4.84606e-43
TSPYL5	protein_coding	1321.46	-1.6244	0.118111	-13.7532	4.87233e-43
TNFAIP3	protein_coding	4114.05	1.27305	0.0925949	13.7486	5.19432e-43
TLR3	protein_coding	5629.12	1.49512	0.108763	13.7466	5.34105e-43
GATM	protein_coding	27006.9	-2.20152	0.160159	-13.7459	5.39119e-43
STARD9	protein_coding	1139.92	1.45588	0.105935	13.7432	5.59796e-43
CRIP1	protein_coding	182.886	1.90736	0.138804	13.7415	5.7314e-43
BICDL1	protein_coding	3188.06	-2.01643	0.146768	-13.7389	5.93431e-43
VWA7	protein_coding	425.425	-1.58278	0.115213	-13.7378	6.02424e-43
TPRG1	protein_coding	152.357	2.21731	0.161426	13.7357	6.20301e-43
LRRC36	protein_coding	132.758	1.82137	0.132644	13.7313	6.59788e-43
FREM1	protein_coding	617.942	-3.35959	0.244712	-13.7288	6.82652e-43
WDR90	protein_coding	1639.29	1.33465	0.0972236	13.7277	6.93145e-43
CCDC84	protein_coding	876.981	1.73069	0.126262	13.7071	9.20038e-43
DOCK6	protein_coding	5481.25	1.17666	0.0858479	13.7063	9.30766e-43
PELI2	protein_coding	918.137	-1.26796	0.0925659	-13.6979	1.04439e-42
MAN1A1	protein_coding	7661.93	-1.42299	0.103884	-13.6979	1.04522e-42
TUBB2B	protein_coding	229.512	-2.59872	0.189783	-13.6931	1.11592e-42
NR1H3	protein_coding	2197.41	1.03454	0.0755619	13.6913	1.14472e-42
GMPR	protein_coding	731.506	-2.29711	0.167842	-13.6861	1.22856e-42
ADAMTS16	protein_coding	297.305	-2.67354	0.19537	-13.6845	1.25748e-42
SLC5A3	protein_coding	8686.07	-1.98192	0.144858	-13.6818	1.30425e-42
PLOD1	protein_coding	16610.3	1.33702	0.0977231	13.6817	1.30543e-42
DDX39A	protein_coding	2538.45	1.02777	0.0751249	13.6808	1.32267e-42
XRCC3	protein_coding	398.025	1.44355	0.105559	13.6753	1.42562e-42
TBC1D30	protein_coding	339.065	-1.10647	0.0809225	-13.6732	1.46847e-42
CDKL2	protein_coding	397.025	-1.62027	0.118541	-13.6684	1.56769e-42
GOT2	protein_coding	6589.79	-1.07824	0.0788867	-13.6682	1.57239e-42
TRAT1	protein_coding	146.915	2.33992	0.171215	13.6666	1.60803e-42
SH2B2	protein_coding	367.759	1.3061	0.0956099	13.6607	1.74276e-42
ILDR1	protein_coding	625.154	-2.02356	0.148183	-13.6558	1.86403e-42
C7	protein_coding	12548.8	-3.34297	0.244861	-13.6526	1.94898e-42
ANXA1	protein_coding	10563.3	1.32787	0.0972708	13.6513	1.98397e-42
NOTCH4	protein_coding	6957.39	1.56566	0.114702	13.6498	2.02504e-42
TLR7	protein_coding	758.266	2.06077	0.150983	13.6491	2.04515e-42
NINL	protein_coding	1175.55	-1.22669	0.0898904	-13.6466	2.1166e-42
C5orf56	protein_coding	518.159	1.21146	0.0888528	13.6345	2.49857e-42
F2RL3	protein_coding	1770.71	2.34616	0.172092	13.6331	2.54364e-42
ESRP2	protein_coding	890.865	-1.53835	0.112861	-13.6305	2.63806e-42
RASGRP3	protein_coding	2671.43	1.02868	0.0754828	13.628	2.73101e-42
NFKBIE	protein_coding	2169.89	1.2224	0.0896998	13.6277	2.74186e-42
NUF2	protein_coding	133.052	1.98087	0.145367	13.6267	2.7785e-42
DCLK1	protein_coding	1683.87	2.14521	0.157434	13.6261	2.80004e-42
BCKDHB	protein_coding	1220.82	-1.30924	0.0961268	-13.62	3.0472e-42
MEF2C	protein_coding	5221.61	1.27156	0.0933692	13.6186	3.10504e-42
CYS1	protein_coding	6941.06	-2.09695	0.154005	-13.6161	3.21158e-42
NINJ2	protein_coding	136.964	1.64797	0.121136	13.6042	3.77921e-42
CSF1R	protein_coding	6326.1	1.60684	0.118163	13.5985	4.08702e-42
TSGA10	protein_coding	247.198	-1.09894	0.0808153	-13.5982	4.10532e-42
PXDN	protein_coding	7904.14	1.68026	0.123624	13.5917	4.48827e-42
AQP9	protein_coding	765.476	3.39675	0.249965	13.5889	4.66164e-42
TWSG1	protein_coding	4006.23	-1.17036	0.0862225	-13.5737	5.73823e-42
SAMD12	protein_coding	685.006	-1.96401	0.144705	-13.5725	5.82828e-42
CCL4L2	protein_coding	447.146	2.56457	0.188953	13.5725	5.82745e-42
CHST15	protein_coding	5517.71	1.66041	0.12239	13.5666	6.31905e-42
AGMAT	protein_coding	2993.68	-2.46501	0.181778	-13.5606	6.86166e-42
BTNL9	protein_coding	3359.82	2.1602	0.159328	13.5582	7.08281e-42
ABLIM1	protein_coding	10475.5	-1.01445	0.0748236	-13.5579	7.10956e-42
KAZN	protein_coding	1927.37	-1.09282	0.0806745	-13.546	8.36649e-42
SCN4B	protein_coding	2046.92	1.95391	0.144367	13.5343	9.81412e-42
ANKRD37	protein_coding	674.891	1.32706	0.0980701	13.5317	1.01596e-41
SYP	protein_coding	187.384	-1.55468	0.114899	-13.5309	1.02733e-41
GIMAP2	protein_coding	885.78	1.26672	0.0936382	13.5278	1.07125e-41
PLOD2	protein_coding	18713.9	1.78631	0.132056	13.5269	1.0851e-41
GDPD5	protein_coding	708.981	1.3964	0.103251	13.5243	1.12438e-41
PTGR1	protein_coding	5336.53	-1.31222	0.097086	-13.5161	1.257e-41
PLA2G16	protein_coding	7275.07	1.05415	0.0780269	13.5101	1.36341e-41
TAZ	protein_coding	1403.96	1.11412	0.0824951	13.5053	1.45441e-41
FGFR1OP	protein_coding	1705.98	1.34198	0.0994148	13.4988	1.5891e-41
CCNB2	protein_coding	286.214	1.74838	0.129534	13.4975	1.61723e-41
EVPL	protein_coding	1144.76	-1.54221	0.114364	-13.4852	1.91238e-41
GLRX5	protein_coding	1961.2	-1.08967	0.0808329	-13.4805	2.03744e-41
DOCK8	protein_coding	5555.82	1.16888	0.086743	13.4753	2.1869e-41
CD200R1	protein_coding	221.022	2.21355	0.164368	13.467	2.44442e-41
GSAP	protein_coding	2085.87	1.16164	0.086326	13.4565	2.82143e-41
NTN4	protein_coding	8625.6	-1.65461	0.122963	-13.4562	2.8325e-41
DNM3	protein_coding	462.398	-1.25462	0.0932682	-13.4517	3.00739e-41
TSPYL1	protein_coding	8014.45	-1.02891	0.0765204	-13.4462	3.24301e-41
ABI3	protein_coding	1550.78	1.07157	0.0797293	13.4402	3.51696e-41
ATP5A1	protein_coding	30335.9	-1.23625	0.092007	-13.4365	3.69737e-41
MAN1C1	protein_coding	1296.65	-2.20443	0.164076	-13.4354	3.75007e-41
THSD4	protein_coding	1642.29	-1.98523	0.147777	-13.4339	3.82507e-41
RBM47	protein_coding	8621.36	-1.10595	0.0824359	-13.4159	4.87866e-41
AK7	protein_coding	313.969	-1.52501	0.113682	-13.4147	4.95634e-41
CNGA1	protein_coding	176.133	-2.50607	0.186859	-13.4115	5.17659e-41
INSR	protein_coding	21054.4	1.2481	0.0930758	13.4095	5.31869e-41
NEK2	protein_coding	139.816	2.06874	0.154343	13.4035	5.76809e-41
MRPS6	protein_coding	3470.42	-1.5893	0.118602	-13.4003	6.02593e-41
CREB5	protein_coding	2398.37	1.47665	0.110238	13.3951	6.46219e-41
NRARP	protein_coding	762.451	1.63742	0.122243	13.3948	6.48572e-41
ATAD5	protein_coding	221.573	1.18973	0.0888463	13.3909	6.83308e-41
VAMP5	protein_coding	3078.13	1.22308	0.0913645	13.3869	7.21592e-41
RNASE6	protein_coding	1152.27	1.53303	0.114582	13.3793	7.98961e-41
CD248	protein_coding	4157.3	1.79293	0.134028	13.3772	8.21631e-41
FBLN7	protein_coding	522.249	2.19161	0.163873	13.3738	8.60551e-41
FBXO21	protein_coding	4848.37	-1.06774	0.0798719	-13.3682	9.27308e-41
TDRD6	protein_coding	137.44	1.82647	0.136748	13.3564	1.08651e-40
AGL	protein_coding	2394.62	-1.01823	0.0762422	-13.3551	1.10545e-40
CCNL2	protein_coding	5107.52	1.79851	0.134692	13.3528	1.14115e-40
CDH23	protein_coding	526.123	2.34979	0.175985	13.3522	1.14992e-40
CLSTN2	protein_coding	969.967	-2.72055	0.203833	-13.347	1.2339e-40
ZNF276	protein_coding	1002.83	1.29523	0.0971203	13.3363	1.42287e-40
TUBB6	protein_coding	3870.5	1.17038	0.0877679	13.3349	1.44954e-40
DNAJC28	protein_coding	116.443	-1.17306	0.0880293	-13.3257	1.63993e-40
ADGRE5	protein_coding	5384.58	1.12276	0.0842986	13.3189	1.79763e-40
SNAI3	protein_coding	99.3761	1.30507	0.0980384	13.3119	1.97495e-40
FOXJ3	protein_coding	9399.83	1.62265	0.121912	13.31	2.02535e-40
HACD3	protein_coding	6309.52	-1.38995	0.104571	-13.292	2.57765e-40
ANG	protein_coding	1278.13	1.59747	0.120196	13.2905	2.62808e-40
GLDC	protein_coding	1375.12	-2.35537	0.177303	-13.2845	2.84841e-40
BCL7A	protein_coding	1622.51	-1.03102	0.0776394	-13.2796	3.03885e-40
ANO7	protein_coding	202.296	1.10239	0.0830382	13.2758	3.20005e-40
ZGRF1	protein_coding	182.908	1.20638	0.0909065	13.2705	3.43063e-40
ALOX12	protein_coding	139.424	1.19765	0.0902917	13.2642	3.73333e-40
NRL	protein_coding	104.954	-1.172	0.0883757	-13.2615	3.86835e-40
TLR8	protein_coding	396.21	2.10122	0.158561	13.2518	4.40463e-40
OAS2	protein_coding	3212.22	1.31684	0.0994103	13.2465	4.72751e-40
XRCC2	protein_coding	109.12	1.58568	0.119716	13.2454	4.79939e-40
SIPA1L2	protein_coding	2929.53	1.13075	0.0854221	13.2372	5.3501e-40
CAT	protein_coding	11813.1	-1.27717	0.0965247	-13.2315	5.77008e-40
TUBA1B	protein_coding	11604.7	1.08712	0.0821638	13.2312	5.79918e-40
OR51E2	protein_coding	182.95	2.2052	0.166696	13.2288	5.98246e-40
LMNB1	protein_coding	956.403	1.34717	0.10186	13.2257	6.23524e-40
IL2RG	protein_coding	2065.56	1.89363	0.143196	13.224	6.37488e-40
ARL4A	protein_coding	1044.86	1.12207	0.0848517	13.2239	6.38636e-40
DNASE1L3	protein_coding	605.533	-2.17205	0.164269	-13.2226	6.502e-40
LNX1	protein_coding	989.404	-1.52554	0.115416	-13.2177	6.93536e-40
KNTC1	protein_coding	969.198	1.15709	0.0875821	13.2115	7.52973e-40
FAM184A	protein_coding	227.815	-1.60513	0.121531	-13.2075	7.937e-40
LSMEM1	protein_coding	120.876	1.84319	0.139641	13.1995	8.83168e-40
PLEKHB1	protein_coding	569.199	-2.3194	0.175722	-13.1992	8.86488e-40
LLGL2	protein_coding	3056.51	-1.24644	0.0945015	-13.1896	1.00686e-39
THBS3	protein_coding	1680.21	1.24144	0.094125	13.1893	1.0109e-39
MLIP	protein_coding	120.134	2.12643	0.161244	13.1877	1.03355e-39
PMEPA1	protein_coding	7815.83	1.60566	0.121806	13.1821	1.11302e-39
ZNF581	protein_coding	1151.65	1.08341	0.0821884	13.182	1.11376e-39
KDELC1	protein_coding	948.389	1.22626	0.0930505	13.1784	1.1677e-39
RPL36A	protein_coding	3941.75	1.28117	0.0972182	13.1783	1.16972e-39
FZD1	protein_coding	9014.95	1.26298	0.0958437	13.1775	1.18313e-39
APBB3	protein_coding	1130.03	1.47967	0.112395	13.165	1.39601e-39
HIST1H3H	protein_coding	178.44	2.57382	0.195525	13.1637	1.42009e-39
SACS	protein_coding	1598.82	1.26348	0.0959886	13.1629	1.43539e-39
GPR82	protein_coding	85.5675	1.96086	0.149078	13.1533	1.63006e-39
NPIPA1	protein_coding	223.49	1.741	0.132396	13.15	1.70228e-39
ABCA12	protein_coding	487.557	2.45647	0.186997	13.1364	2.03607e-39
THEMIS	protein_coding	250.695	2.17372	0.165612	13.1254	2.35408e-39
EXOC3L4	protein_coding	737.857	2.05351	0.156522	13.1196	2.54381e-39
LPIN3	protein_coding	2431.78	1.55784	0.118823	13.1106	2.86457e-39
AGFG2	protein_coding	1641.05	-1.16744	0.0890963	-13.1032	3.15786e-39
COL9A2	protein_coding	514.937	-2.19013	0.167234	-13.0962	3.46347e-39
CLSPN	protein_coding	125.539	1.61088	0.123006	13.096	3.4724e-39
IQCH	protein_coding	158.734	-1.22305	0.093392	-13.0958	3.47852e-39
RGS14	protein_coding	2494.74	1.36899	0.104598	13.0881	3.85106e-39
ZNF337	protein_coding	220.89	1.2772	0.0976685	13.0769	4.46352e-39
CLEC5A	protein_coding	299.174	2.02499	0.155087	13.0571	5.78777e-39
HIF1A	protein_coding	11555	-1.19442	0.0914768	-13.057	5.79425e-39
C19orf33	protein_coding	1705.92	2.55683	0.19584	13.0557	5.89594e-39
LRRC66	protein_coding	141.301	1.94464	0.148964	13.0544	5.99573e-39
GABARAPL1	protein_coding	8614.8	-1.53662	0.117721	-13.0531	6.1028e-39
ADAM19	protein_coding	1013.43	1.58676	0.121583	13.0508	6.28925e-39
PRKD1	protein_coding	1392.13	-1.0759	0.0825363	-13.0355	7.68841e-39
EGFR	protein_coding	19302.9	1.44813	0.111123	13.0317	8.07632e-39
MZT2A	protein_coding	2329.74	1.62623	0.12481	13.0296	8.30302e-39
CPNE5	protein_coding	552.633	1.7663	0.135578	13.0279	8.4869e-39
CHTF18	protein_coding	444.008	1.55297	0.119206	13.0276	8.52928e-39
EPHA1	protein_coding	321.027	-1.54727	0.118839	-13.0199	9.43059e-39
FCGR2B	protein_coding	584.028	1.98741	0.152668	13.0179	9.67987e-39
CARD11	protein_coding	1012.49	2.11934	0.162897	13.0103	1.06934e-38
KLHL21	protein_coding	3325.64	-1.17339	0.0902185	-13.0061	1.12971e-38
C3orf36	protein_coding	161.44	2.09924	0.161411	13.0056	1.13732e-38
ATP11A	protein_coding	16444.5	1.46822	0.112906	13.0038	1.16338e-38
HIBADH	protein_coding	6501.38	-1.08055	0.0830956	-13.0037	1.16496e-38
BTC	protein_coding	245.228	-1.832	0.140935	-12.9989	1.241e-38
EIF4EBP3	protein_coding	625.496	1.29484	0.0996245	12.9972	1.26948e-38
NANOS1	protein_coding	134.134	-1.60812	0.123768	-12.993	1.34078e-38
DDX39B	protein_coding	4181.22	1.57106	0.120923	12.9922	1.35402e-38
CDCA5	protein_coding	297.686	1.59686	0.122929	12.9901	1.39191e-38
SCART1	protein_coding	140.658	2.22155	0.1711	12.9839	1.51054e-38
IL7	protein_coding	288.9	1.14245	0.0879929	12.9834	1.51915e-38
LMO7	protein_coding	4459.38	-1.24995	0.0963186	-12.9772	1.64806e-38
VWA5A	protein_coding	1715.52	-1.17677	0.0906934	-12.9753	1.68917e-38
ADD2	protein_coding	230.31	2.70311	0.208435	12.9686	1.84312e-38
RIOX2	protein_coding	798.442	-1.23486	0.0952403	-12.9657	1.91455e-38
CDCA7	protein_coding	220.079	2.01386	0.155373	12.9615	2.02243e-38
CSF2RB	protein_coding	935.89	1.34036	0.103441	12.9577	2.12447e-38
PCED1A	protein_coding	2528.37	1.00856	0.0778564	12.954	2.22896e-38
CENPI	protein_coding	86.7313	1.58971	0.122723	12.9536	2.24075e-38
PRTG	protein_coding	166.745	-2.05159	0.158423	-12.9501	2.34692e-38
GPAT3	protein_coding	1855.46	-2.49393	0.192767	-12.9375	2.76339e-38
DAO	protein_coding	651.595	-3.23247	0.249885	-12.9358	2.82596e-38
ITGB6	protein_coding	2211.72	-2.59095	0.200358	-12.9316	2.9852e-38
MPC1	protein_coding	3246.68	-1.5464	0.119602	-12.9295	3.06764e-38
ALPK2	protein_coding	4732.88	1.93187	0.149425	12.9287	3.1018e-38
ADH6	protein_coding	686.52	-2.62212	0.202874	-12.9248	3.26022e-38
TBC1D9	protein_coding	3387.72	-1.17394	0.0909031	-12.9142	3.74405e-38
FCHSD1	protein_coding	941.121	1.30463	0.101026	12.9138	3.76477e-38
NRM	protein_coding	1148.25	1.09817	0.0850419	12.9133	3.78686e-38
EMB	protein_coding	1332.41	1.54276	0.119473	12.9131	3.79847e-38
CDH13	protein_coding	5495.62	1.58453	0.122737	12.91	3.95429e-38
ITM2C	protein_coding	9695.22	-1.39931	0.108417	-12.9067	4.12487e-38
GRIN2D	protein_coding	108.525	1.99015	0.154198	12.9065	4.13869e-38
RARA	protein_coding	3949.71	1.05411	0.0817354	12.8967	4.69966e-38
EME2	protein_coding	744.343	1.89647	0.147061	12.8958	4.75347e-38
CDHR3	protein_coding	489.46	1.38355	0.107319	12.892	4.99627e-38
ASPDH	protein_coding	325.726	-2.73684	0.212379	-12.8866	5.35689e-38
CD300LB	protein_coding	116.67	1.72876	0.134178	12.8841	5.53074e-38
NID1	protein_coding	13647	1.36515	0.105971	12.8822	5.66666e-38
LY96	protein_coding	442.791	1.71061	0.132806	12.8805	5.7926e-38
HUNK	protein_coding	862.015	-1.73189	0.134562	-12.8706	6.5857e-38
KITLG	protein_coding	2992.64	-1.6624	0.129237	-12.8632	7.25213e-38
IL18RAP	protein_coding	110.352	1.758	0.136701	12.8602	7.53696e-38
GYPC	protein_coding	3599.98	1.04384	0.0812403	12.8488	8.73878e-38
CXorf21	protein_coding	207.175	1.61973	0.126094	12.8454	9.123e-38
RBCK1	protein_coding	7285.04	1.21065	0.0942953	12.8389	9.92281e-38
VDR	protein_coding	1434.86	-1.74223	0.135713	-12.8376	1.0101e-37
COL21A1	protein_coding	743.983	2.20158	0.171609	12.8291	1.12655e-37
FAM153A	protein_coding	263.163	3.23624	0.252291	12.8274	1.15142e-37
ICAM1	protein_coding	5996.75	1.40773	0.109754	12.8263	1.16885e-37
PABPC1L	protein_coding	1129.87	2.22619	0.173575	12.8255	1.17999e-37
KIF18A	protein_coding	148.366	1.5346	0.119659	12.8248	1.1916e-37
PPM1H	protein_coding	1389.41	-1.92003	0.149746	-12.8219	1.23559e-37
SBNO2	protein_coding	3767.59	1.00807	0.0786442	12.8181	1.29797e-37
ADAMTS15	protein_coding	708.686	-1.94477	0.151729	-12.8173	1.3112e-37
HSD11B2	protein_coding	7996.28	-2.80918	0.219194	-12.8159	1.33551e-37
AATK	protein_coding	308.908	1.38133	0.107793	12.8147	1.35696e-37
CARD14	protein_coding	187.823	2.64859	0.206713	12.8129	1.38853e-37
APOLD1	protein_coding	14252.8	1.94346	0.151719	12.8096	1.44816e-37
MISP3	protein_coding	466.037	-1.66286	0.12983	-12.808	1.47905e-37
BCAN	protein_coding	121.65	1.73965	0.135873	12.8035	1.56684e-37
SEMA3F	protein_coding	6459.63	1.14274	0.0893693	12.7867	1.9464e-37
MAL	protein_coding	5804.38	-3.30225	0.258258	-12.7866	1.94719e-37
PIWIL4	protein_coding	210.059	1.2799	0.100101	12.786	1.96252e-37
NPDC1	protein_coding	2946.12	1.40033	0.109532	12.7847	1.99678e-37
TREX2	protein_coding	186.575	2.65989	0.208061	12.7842	2.00932e-37
WDFY4	protein_coding	915.604	1.71057	0.133854	12.7794	2.13717e-37
ARHGAP11A	protein_coding	398.223	1.38513	0.108408	12.7771	2.2021e-37
AL161911.1	protein_coding	92.2609	-1.31014	0.102543	-12.7765	2.21927e-37
P2RY13	protein_coding	497.07	1.66573	0.130391	12.7749	2.26336e-37
RPLP0	protein_coding	75113.8	1.06472	0.083362	12.7722	2.34304e-37
PLXNC1	protein_coding	1796.8	1.46572	0.11477	12.771	2.382e-37
TMEM30B	protein_coding	1030.04	-2.92779	0.229362	-12.7649	2.57347e-37
PLB1	protein_coding	282.247	1.32078	0.103538	12.7565	2.86797e-37
RPS8	protein_coding	56291.4	1.03932	0.0815021	12.7521	3.03543e-37
LRAT	protein_coding	261.065	2.26106	0.177374	12.7474	3.22317e-37
RPL18	protein_coding	35518	1.1693	0.0917876	12.7392	3.57896e-37
SH3PXD2B	protein_coding	2021.11	1.54097	0.121007	12.7345	3.80196e-37
CARD9	protein_coding	266.605	1.50411	0.118137	12.7319	3.93084e-37
EXO1	protein_coding	114.981	1.68935	0.132716	12.7291	4.07591e-37
RPL18A	protein_coding	15969.5	1.1386	0.0895145	12.7197	4.59546e-37
CENPF	protein_coding	769.614	1.81082	0.142511	12.7065	5.44341e-37
TSPAN33	protein_coding	5298.8	-1.55117	0.122081	-12.7061	5.47229e-37
FCMR	protein_coding	508.605	1.48318	0.116746	12.7043	5.60028e-37
SHROOM1	protein_coding	1054.59	1.1425	0.0899556	12.7007	5.86208e-37
MYC	protein_coding	5691.51	1.52296	0.119927	12.6991	5.97941e-37
ATP8B1	protein_coding	1890.2	-1.27612	0.100499	-12.6979	6.0761e-37
PIDD1	protein_coding	756.6	1.40209	0.110602	12.6769	7.94589e-37
SMIM5	protein_coding	511.963	-3.16425	0.24966	-12.6742	8.21454e-37
CACNA1F	protein_coding	109.387	2.27913	0.180108	12.6542	1.06046e-36
EFNA1	protein_coding	6976.36	1.22622	0.0969627	12.6463	1.17293e-36
UQCRFS1	protein_coding	3783.11	-1.22863	0.0972715	-12.631	1.42529e-36
DENND1B	protein_coding	1197.18	-1.12041	0.0887323	-12.6268	1.50229e-36
SYNE1	protein_coding	8481.13	-1.0532	0.083436	-12.6229	1.57975e-36
GPBAR1	protein_coding	114.381	-1.67972	0.133113	-12.6188	1.66406e-36
KLHL31	protein_coding	97.8421	1.65876	0.131455	12.6185	1.66994e-36
TGFA	protein_coding	8634.85	1.65877	0.131483	12.6159	1.72578e-36
CD101	protein_coding	135.038	1.46511	0.116182	12.6105	1.84823e-36
IRF9	protein_coding	372.217	1.68917	0.134014	12.6044	1.99709e-36
PLEKHG3	protein_coding	2807.16	-1.02941	0.0816858	-12.602	2.05765e-36
CLASRP	protein_coding	1587.68	1.21756	0.0967119	12.5895	2.41085e-36
ALDH4A1	protein_coding	5149.35	-2.06118	0.16373	-12.5889	2.43027e-36
P4HA2	protein_coding	6604.07	1.272	0.101068	12.5856	2.53429e-36
FYB1	protein_coding	2729.7	1.66526	0.132335	12.5837	2.59448e-36
SDC3	protein_coding	6715.6	1.07266	0.085243	12.5835	2.60197e-36
C3orf70	protein_coding	650.411	1.48021	0.117718	12.5741	2.92969e-36
ARHGAP26	protein_coding	3215.22	1.00363	0.0798395	12.5705	3.06617e-36
FGFBP2	protein_coding	139.1	1.88199	0.149728	12.5694	3.10922e-36
KIF13B	protein_coding	4555.17	-1.37102	0.109079	-12.5691	3.12373e-36
MCTP2	protein_coding	1443.88	1.2729	0.101289	12.5669	3.20977e-36
PRRT3	protein_coding	150.792	-1.27476	0.10144	-12.5667	3.22051e-36
TNFRSF25	protein_coding	504.226	1.85592	0.147707	12.5648	3.29642e-36
HLA-DOB	protein_coding	283.174	2.17369	0.173067	12.5598	3.51044e-36
CHKB	protein_coding	302.3	1.7237	0.137298	12.5545	3.75672e-36
TXLNB	protein_coding	95.4559	1.8435	0.146881	12.551	3.92621e-36
CENPT	protein_coding	1555.71	1.18099	0.0941184	12.5479	4.08236e-36
HEYL	protein_coding	4314.32	1.62737	0.129746	12.5427	4.35692e-36
PCDHB9	protein_coding	266.205	1.59432	0.127155	12.5384	4.6013e-36
GLIPR1	protein_coding	1806.66	1.50134	0.11974	12.5383	4.6094e-36
WDR54	protein_coding	1755.72	1.16432	0.0928625	12.5381	4.6198e-36
LDHD	protein_coding	1199.16	-2.27153	0.1812	-12.536	4.7425e-36
PREX2	protein_coding	3186.65	1.99314	0.159002	12.5353	4.78558e-36
SH3D21	protein_coding	886.737	1.45942	0.116471	12.5303	5.09828e-36
ZNF354B	protein_coding	574.866	1.09675	0.0875616	12.5255	5.4181e-36
ACRBP	protein_coding	249.762	1.26854	0.101279	12.5252	5.43682e-36
SLC25A30	protein_coding	3126.05	-1.02959	0.0822124	-12.5236	5.54785e-36
RFLNB	protein_coding	3145.53	1.44815	0.115695	12.517	6.02853e-36
ABCB4	protein_coding	333.079	2.07823	0.166077	12.5137	6.28407e-36
NAP1L5	protein_coding	494.3	-1.00393	0.0802414	-12.5114	6.46856e-36
RPL38	protein_coding	18228.8	1.03204	0.0825119	12.5078	6.76782e-36
MAPK11	protein_coding	964.166	1.21479	0.0971613	12.5028	7.20241e-36
SPRY4	protein_coding	7040.73	1.27033	0.101649	12.4973	7.72677e-36
ARL6IP4	protein_coding	132.233	1.67255	0.133872	12.4936	8.08618e-36
RPL37	protein_coding	35079.2	1.04718	0.0838177	12.4935	8.09833e-36
ARHGAP42	protein_coding	2533.47	1.23245	0.098663	12.4915	8.30269e-36
RAD51AP1	protein_coding	208.501	1.30298	0.104316	12.4906	8.39889e-36
RPL22L1	protein_coding	1198.97	1.41328	0.113215	12.4831	9.22654e-36
PRND	protein_coding	345.439	3.29055	0.263747	12.4762	1.00734e-35
STX1B	protein_coding	200.799	1.73154	0.138869	12.4688	1.10437e-35
MSX1	protein_coding	259.017	1.38068	0.110902	12.4495	1.40734e-35
SYNM	protein_coding	2509.13	1.05766	0.0849839	12.4455	1.48025e-35
TRIM2	protein_coding	5320.96	-1.82048	0.146298	-12.4437	1.51371e-35
JUP	protein_coding	14912.2	-1.0286	0.0826749	-12.4416	1.55448e-35
CDCA3	protein_coding	226.446	1.70413	0.137015	12.4376	1.6343e-35
KCNJ16	protein_coding	12872	-1.58304	0.127317	-12.4338	1.71275e-35
ZNF331	protein_coding	1639.38	-1.21114	0.0974274	-12.4313	1.76845e-35
ACO1	protein_coding	6093.97	-1.10415	0.0888608	-12.4256	1.89803e-35
RPS14	protein_coding	47581.7	1.0912	0.0878271	12.4245	1.92521e-35
SEMA4A	protein_coding	1450.42	-1.56416	0.125897	-12.4241	1.93358e-35
TRIM52	protein_coding	1147.7	1.07528	0.0865501	12.4238	1.94058e-35
CCRL2	protein_coding	383.214	1.40384	0.113037	12.4193	2.0541e-35
MAMDC2	protein_coding	202.441	-2.02097	0.162761	-12.4167	2.12027e-35
VEPH1	protein_coding	1854.45	-1.47732	0.118987	-12.4158	2.14617e-35
IDNK	protein_coding	532.724	-1.18807	0.0958167	-12.3994	2.63272e-35
CDH24	protein_coding	447.733	1.10654	0.0892739	12.3949	2.7856e-35
NFATC2	protein_coding	1542.78	1.15328	0.0931782	12.3771	3.47515e-35
PILRB	protein_coding	533.51	2.42595	0.196033	12.3752	3.5589e-35
MYL5	protein_coding	692.212	1.21842	0.0984714	12.3733	3.64528e-35
IGFLR1	protein_coding	137.224	1.6626	0.134422	12.3686	3.86717e-35
PCDHB14	protein_coding	791.091	1.37291	0.111022	12.3661	3.98476e-35
GAS1	protein_coding	352.737	-2.09248	0.169275	-12.3615	4.22427e-35
SLCO2B1	protein_coding	6310.38	1.55598	0.125975	12.3515	4.78221e-35
OVOL1	protein_coding	234.29	-2.34363	0.189819	-12.3466	5.07891e-35
SUSD1	protein_coding	1117.11	-1.43717	0.116405	-12.3463	5.10017e-35
GK	protein_coding	1400.46	-1.51967	0.123249	-12.3301	6.23836e-35
GRAMD1C	protein_coding	1304.41	-1.41762	0.115039	-12.323	6.81522e-35
PITPNM3	protein_coding	224.107	-1.51688	0.12313	-12.3193	7.12992e-35
BAG1	protein_coding	4147.51	-1.21812	0.0989167	-12.3146	7.5595e-35
KDF1	protein_coding	298.919	-2.04054	0.165727	-12.3127	7.74265e-35
PER2	protein_coding	2608	1.13273	0.0920056	12.3116	7.84803e-35
VCAM1	protein_coding	32642	1.78701	0.145157	12.3109	7.91604e-35
RPL36	protein_coding	20855.9	1.27711	0.103749	12.3096	8.03987e-35
MFHAS1	protein_coding	1826.07	-1.14952	0.0933954	-12.3081	8.19095e-35
OXNAD1	protein_coding	604.78	-1.18603	0.0963682	-12.3073	8.27331e-35
B4GALNT2	protein_coding	583.586	-3.60512	0.293319	-12.2908	1.01486e-34
SLC6A8	protein_coding	24455.7	1.64023	0.133471	12.289	1.03742e-34
TJP3	protein_coding	290.389	-2.77928	0.226185	-12.2877	1.05491e-34
SLC39A14	protein_coding	19140.3	1.70437	0.138727	12.2858	1.07981e-34
C10orf128	protein_coding	818.428	1.32325	0.107727	12.2834	1.11281e-34
SP140	protein_coding	252.165	1.78307	0.145175	12.2822	1.12905e-34
RUBCNL	protein_coding	236.48	1.47467	0.120082	12.2805	1.15309e-34
CIITA	protein_coding	2496.83	1.41043	0.11489	12.2764	1.21224e-34
CRB2	protein_coding	312.454	-2.91006	0.237183	-12.2693	1.32393e-34
NPHP3	protein_coding	640.022	1.14284	0.0931585	12.2677	1.35012e-34
APOL2	protein_coding	5798.48	1.37768	0.11232	12.2657	1.38383e-34
SSBP4	protein_coding	2009.93	1.00522	0.081998	12.259	1.50252e-34
CHD3	protein_coding	6410.19	-1.02118	0.0833401	-12.2531	1.61618e-34
PROM2	protein_coding	2007.91	-3.5258	0.287911	-12.2461	1.76223e-34
FRY	protein_coding	2881.41	-1.18628	0.0969791	-12.2323	2.08995e-34
PDXK	protein_coding	8163.41	-1.06576	0.087137	-12.2308	2.12815e-34
LPAR6	protein_coding	2880.1	1.18546	0.0969245	12.2307	2.13006e-34
CIART	protein_coding	578.148	1.35252	0.110594	12.2296	2.16121e-34
C1orf186	protein_coding	3183.52	1.94982	0.159485	12.2257	2.26655e-34
ADAMTS4	protein_coding	4921.96	1.99945	0.163581	12.223	2.34377e-34
UBXN11	protein_coding	1842.04	1.32915	0.108742	12.2229	2.34547e-34
SUCNR1	protein_coding	1366.67	-2.15715	0.176518	-12.2205	2.41464e-34
HOXB8	protein_coding	633.697	-2.24486	0.183712	-12.2194	2.44749e-34
TMEM173	protein_coding	4006.57	1.03909	0.0850715	12.2143	2.60615e-34
ACSM3	protein_coding	2010.13	-1.4426	0.118122	-12.2128	2.65731e-34
QTRT1	protein_coding	2315.38	1.18943	0.0974006	12.2117	2.69199e-34
WDR62	protein_coding	164.501	1.51718	0.124257	12.21	2.74799e-34
NRBP2	protein_coding	3008.66	1.4897	0.122016	12.209	2.78129e-34
AFMID	protein_coding	2051.02	-1.0787	0.0883571	-12.2084	2.80339e-34
PECAM1	protein_coding	37870	1.2293	0.100695	12.2081	2.81265e-34
VMP1	protein_coding	11866.2	1.26705	0.103823	12.2038	2.96502e-34
C16orf45	protein_coding	894.021	-1.06387	0.0871796	-12.2032	2.98742e-34
RGS18	protein_coding	315.988	1.58574	0.129978	12.2	3.10724e-34
FN1	protein_coding	105654	1.81433	0.14876	12.1963	3.25198e-34
EPHA3	protein_coding	1017.11	1.74356	0.142997	12.193	3.38797e-34
KMT5C	protein_coding	392.151	1.28241	0.105189	12.1915	3.45057e-34
TEPSIN	protein_coding	551.922	1.147	0.0940879	12.1907	3.48533e-34
CCR10	protein_coding	89.3214	1.70517	0.140233	12.1595	5.10456e-34
GRIA4	protein_coding	914.121	3.64626	0.299985	12.1548	5.40803e-34
GCH1	protein_coding	755.863	-1.13973	0.0938003	-12.1506	5.69321e-34
OCLN	protein_coding	643.606	-2.09757	0.172676	-12.1475	5.91739e-34
VKORC1	protein_coding	3642.77	1.17639	0.0968919	12.1413	6.38339e-34
ACSL6	protein_coding	216.623	-2.16217	0.17811	-12.1395	6.52178e-34
FBXO41	protein_coding	498.872	1.96837	0.162212	12.1346	6.9276e-34
SNAP25	protein_coding	461.418	2.00354	0.165127	12.1333	7.03309e-34
ZC3H12D	protein_coding	184.401	1.50136	0.123746	12.1326	7.09971e-34
RUNX2	protein_coding	600.481	1.44698	0.119282	12.1307	7.25874e-34
HOXA4	protein_coding	559.091	1.24896	0.103003	12.1254	7.74373e-34
ANKRD36	protein_coding	206.898	1.45145	0.119708	12.125	7.79025e-34
EPHX2	protein_coding	4597.45	-1.38473	0.114327	-12.112	9.12458e-34
SOD3	protein_coding	2646.28	-1.52937	0.12631	-12.1081	9.57411e-34
TUBA1A	protein_coding	9385.99	1.03183	0.0852316	12.1062	9.78796e-34
2020-03-01	protein_coding	1137.06	1.52286	0.125812	12.1043	1.00249e-33
EHD3	protein_coding	2346.95	-1.28114	0.10589	-12.0987	1.07237e-33
CDS1	protein_coding	1725.03	-1.43553	0.118667	-12.0971	1.09393e-33
ANKRD13B	protein_coding	310.491	1.45807	0.120589	12.0912	1.17516e-33
DNHD1	protein_coding	663.931	1.53316	0.126814	12.0898	1.19595e-33
LAX1	protein_coding	154.047	2.02132	0.167197	12.0895	1.19992e-33
FSTL1	protein_coding	29568.7	1.36993	0.113326	12.0883	1.21714e-33
VWA1	protein_coding	9485	1.31562	0.108865	12.0849	1.26849e-33
ARL10	protein_coding	1327.22	1.28554	0.106439	12.0777	1.38486e-33
ARNT2	protein_coding	2728.13	-1.79047	0.148337	-12.0703	1.51555e-33
FAM107A	protein_coding	2330.76	-1.53076	0.126901	-12.0626	1.66442e-33
CYBB	protein_coding	4829.99	1.77468	0.147125	12.0625	1.66746e-33
ANK2	protein_coding	5941.97	-2.15014	0.178267	-12.0614	1.68929e-33
CORO2B	protein_coding	414.025	-2.01647	0.167239	-12.0574	1.77256e-33
CLK2	protein_coding	2098.44	1.04953	0.0870533	12.0562	1.79975e-33
NFE2L3	protein_coding	2176.9	1.35332	0.112297	12.0513	1.90964e-33
IDUA	protein_coding	791.061	1.2525	0.103969	12.0469	2.01413e-33
CABYR	protein_coding	85.7814	1.45107	0.120464	12.0457	2.04446e-33
GPR35	protein_coding	445.244	2.43436	0.202194	12.0397	2.19668e-33
GLS	protein_coding	16911.5	-1.00079	0.0831257	-12.0394	2.20424e-33
SLC5A4	protein_coding	107.465	1.74034	0.144562	12.0387	2.22381e-33
MASP1	protein_coding	2786.38	1.9855	0.164943	12.0375	2.25764e-33
NRP1	protein_coding	25543.9	1.06145	0.088231	12.0304	2.46033e-33
RAB29	protein_coding	3211.56	-1.15317	0.0958824	-12.0269	2.56621e-33
GLIS1	protein_coding	720.756	1.87544	0.155947	12.0261	2.59069e-33
SHROOM3	protein_coding	2023.27	-1.89288	0.157416	-12.0247	2.63642e-33
ETS1	protein_coding	17373.6	1.13885	0.0947111	12.0245	2.64289e-33
MAP3K9	protein_coding	366.743	-1.68705	0.140311	-12.0236	2.67047e-33
ZMYND12	protein_coding	256.045	-1.33745	0.111252	-12.0218	2.73014e-33
PPIL6	protein_coding	276.643	-1.03554	0.0861395	-12.0216	2.73467e-33
ISG15	protein_coding	2039.64	1.55693	0.129512	12.0215	2.7399e-33
PIP5K1B	protein_coding	369.043	-1.74121	0.14485	-12.0208	2.76387e-33
CCDC74A	protein_coding	668.562	1.52006	0.126461	12.02	2.79015e-33
MC1R	protein_coding	237.534	1.5827	0.131779	12.0103	3.138e-33
CDCA8	protein_coding	244.651	1.48759	0.124004	11.9962	3.71836e-33
LRRC17	protein_coding	504.828	1.62505	0.135553	11.9883	4.09291e-33
GATA2	protein_coding	1008.65	-1.53158	0.127811	-11.9831	4.35474e-33
ZNF296	protein_coding	91.6198	1.58837	0.132575	11.9809	4.4747e-33
UGT8	protein_coding	2551.52	-1.76374	0.147267	-11.9765	4.71764e-33
LIPA	protein_coding	11895.6	1.1667	0.0974811	11.9684	5.20016e-33
EDN1	protein_coding	3581.07	1.75395	0.146558	11.9676	5.25073e-33
LENG8	protein_coding	8264.47	1.56066	0.130444	11.9642	5.47315e-33
MYO15B	protein_coding	7507.36	1.61805	0.135392	11.9509	6.42418e-33
HS3ST3B1	protein_coding	302.048	-1.30008	0.108794	-11.95	6.49624e-33
ZNF132	protein_coding	309.418	-1.02723	0.085966	-11.9492	6.55252e-33
GJA4	protein_coding	3475.73	1.44441	0.120879	11.9491	6.56013e-33
FBXO2	protein_coding	475.21	-2.48732	0.20821	-11.9462	6.7957e-33
CLCN5	protein_coding	5874.12	-1.43481	0.120216	-11.9353	7.75115e-33
PLA2G4A	protein_coding	437.308	-1.59828	0.134037	-11.9242	8.85648e-33
SMIM10	protein_coding	748.696	1.06376	0.0892238	11.9224	9.04484e-33
IGSF3	protein_coding	2995.46	-1.16418	0.0976505	-11.9219	9.09702e-33
C17orf49	protein_coding	88.2132	1.00948	0.0846763	11.9216	9.12972e-33
TLR5	protein_coding	578.882	-1.19531	0.100271	-11.9208	9.22201e-33
C5AR1	protein_coding	1509.05	1.38141	0.115914	11.9175	9.58998e-33
HOGA1	protein_coding	1881.85	-1.90289	0.159772	-11.9101	1.04903e-32
FSTL3	protein_coding	6028.71	1.76894	0.148607	11.9034	1.13567e-32
LAD1	protein_coding	1225	-2.67258	0.224542	-11.9024	1.15038e-32
CYP3A5	protein_coding	1917.95	2.08003	0.174772	11.9014	1.16376e-32
MGARP	protein_coding	427.888	2.98877	0.251138	11.9009	1.17121e-32
NAP1L2	protein_coding	353.269	-2.2585	0.189866	-11.8953	1.25261e-32
PRKCA	protein_coding	2728.98	-1.2316	0.103548	-11.894	1.27216e-32
RTEL1	protein_coding	86.0103	1.12303	0.0944646	11.8883	1.36103e-32
PTPN3	protein_coding	3756.87	-1.29249	0.108799	-11.8796	1.51106e-32
NFASC	protein_coding	2848.63	-1.73318	0.145932	-11.8766	1.5656e-32
ETNK2	protein_coding	2203.25	-1.71381	0.144361	-11.8717	1.66005e-32
LY6E	protein_coding	15812.9	1.69704	0.142953	11.8713	1.66785e-32
CCDC18	protein_coding	179.258	1.18224	0.0996478	11.8642	1.81654e-32
GIMAP5	protein_coding	350.255	1.29951	0.109568	11.8602	1.90463e-32
CDKN1C	protein_coding	1697.62	-1.51676	0.127933	-11.8559	2.00455e-32
MAMDC4	protein_coding	858.964	1.77415	0.149749	11.8475	2.21819e-32
RPL28	protein_coding	30855.3	1.12676	0.0951059	11.8474	2.21999e-32
RPL13	protein_coding	57713.7	1.15644	0.0976159	11.8468	2.2356e-32
WISP2	protein_coding	371.552	3.3633	0.28393	11.8455	2.26959e-32
HIST1H2BN	protein_coding	123.621	1.07164	0.0904978	11.8416	2.37816e-32
DNA2	protein_coding	212.914	1.45582	0.122969	11.839	2.45502e-32
DDX11	protein_coding	994.308	1.27707	0.107876	11.8383	2.47323e-32
PBX1	protein_coding	3908.18	-1.43768	0.121508	-11.832	2.66608e-32
GPD1L	protein_coding	2244.79	-1.55714	0.13167	-11.826	2.86327e-32
NDRG2	protein_coding	7034.13	-1.31976	0.111608	-11.8249	2.90264e-32
MSI2	protein_coding	5874.61	-1.0783	0.0912088	-11.8223	2.99323e-32
C11orf63	protein_coding	404.208	-1.05833	0.0895411	-11.8195	3.09634e-32
LAYN	protein_coding	966.171	1.25654	0.106335	11.8168	3.1964e-32
PLA1A	protein_coding	2773.54	1.63315	0.1383	11.8087	3.51912e-32
DERL3	protein_coding	613.8	2.18466	0.1851	11.8026	3.78321e-32
BDNF	protein_coding	250.175	2.12048	0.179785	11.7945	4.16608e-32
ASGR1	protein_coding	93.2415	1.63057	0.138311	11.7891	4.44318e-32
GPS2	protein_coding	305.902	1.48292	0.125833	11.7848	4.67408e-32
GAREM2	protein_coding	547.93	1.25176	0.106245	11.7818	4.84243e-32
BCL11B	protein_coding	420.956	1.57138	0.133387	11.7806	4.91172e-32
PHYHD1	protein_coding	706.647	-2.24019	0.190202	-11.778	5.07004e-32
PLAC8	protein_coding	216.699	1.77725	0.150959	11.7731	5.37007e-32
CLEC1A	protein_coding	523.852	1.25256	0.106447	11.767	5.77608e-32
PPL	protein_coding	2775.37	-1.52688	0.129986	-11.7465	7.3581e-32
CDK5R1	protein_coding	215.121	1.07831	0.0918144	11.7444	7.54303e-32
NGFR	protein_coding	1866.87	1.85313	0.157811	11.7427	7.69489e-32
CDH6	protein_coding	17792.1	1.75949	0.149841	11.7424	7.7281e-32
C1orf54	protein_coding	786.861	1.08069	0.092149	11.7276	9.20295e-32
AGAP6	protein_coding	290.581	1.5979	0.136264	11.7265	9.32224e-32
PCYT2	protein_coding	1830.88	-1.28945	0.10998	-11.7244	9.55489e-32
ALAS1	protein_coding	2354.14	-1.0175	0.0867876	-11.7241	9.59596e-32
ASAP2	protein_coding	1877.74	-1.19171	0.101684	-11.7197	1.01005e-31
MET	protein_coding	17794.8	1.16614	0.0995048	11.7194	1.01344e-31
CA2	protein_coding	8234.39	-1.49154	0.127369	-11.7104	1.12781e-31
LRRC75B	protein_coding	2135.21	1.45337	0.124156	11.7061	1.18653e-31
SCOC	protein_coding	4058.05	-1.01107	0.0863901	-11.7036	1.22215e-31
IL2RA	protein_coding	270.305	2.2228	0.189937	11.7028	1.23288e-31
BST2	protein_coding	8399.82	1.33344	0.113974	11.6995	1.28194e-31
RGN	protein_coding	1108.41	-1.43252	0.122568	-11.6875	1.47666e-31
APOL1	protein_coding	20516.5	2.0689	0.177051	11.6853	1.51483e-31
CCDC14	protein_coding	1922.32	1.11988	0.095859	11.6825	1.56575e-31
C5	protein_coding	372.534	-1.26938	0.10867	-11.6811	1.5926e-31
G6PC	protein_coding	1229.76	-3.51359	0.300871	-11.6781	1.65008e-31
ADGRA2	protein_coding	4023.11	1.33897	0.114681	11.6756	1.69838e-31
NLRP1	protein_coding	1813.51	1.19127	0.102077	11.6703	1.80778e-31
CHST13	protein_coding	614.043	2.01147	0.172395	11.6678	1.8621e-31
HIGD1B	protein_coding	301.509	1.68932	0.144847	11.6628	1.97518e-31
ACCS	protein_coding	1151.17	1.25484	0.107639	11.6578	2.09332e-31
ARC	protein_coding	226.101	-2.09256	0.179507	-11.6573	2.1064e-31
CENPE	protein_coding	213.771	1.59585	0.136973	11.6508	2.27376e-31
PTPN7	protein_coding	719.275	1.74421	0.149807	11.643	2.49079e-31
FBXL6	protein_coding	673.674	1.13507	0.0974954	11.6423	2.51247e-31
MRGPRF	protein_coding	285.129	-2.19569	0.188677	-11.6373	2.66357e-31
NEBL	protein_coding	4513.75	-1.52723	0.131447	-11.6186	3.31479e-31
C19orf38	protein_coding	172.614	1.25874	0.108362	11.6161	3.41428e-31
MARVELD1	protein_coding	2426.19	1.10971	0.0955462	11.6143	3.48462e-31
WDR72	protein_coding	4730.48	-1.92933	0.166123	-11.6138	3.50618e-31
SPARCL1	protein_coding	30895.1	1.58791	0.13674	11.6126	3.55535e-31
ZC3HAV1L	protein_coding	432.934	1.16269	0.10014	11.6107	3.6359e-31
APOL6	protein_coding	6728.51	1.03278	0.0889975	11.6046	3.90628e-31
RPS20	protein_coding	46474.7	1.07683	0.0928081	11.6028	3.98971e-31
PAM16	protein_coding	398.021	1.04417	0.090024	11.5987	4.18172e-31
PGBD5	protein_coding	1357.72	1.76645	0.152298	11.5987	4.18394e-31
MT1F	protein_coding	1764.29	-2.1489	0.185466	-11.5865	4.82367e-31
AGBL2	protein_coding	155.864	1.48546	0.128334	11.575	5.51924e-31
ANK1	protein_coding	645.191	2.19688	0.189901	11.5685	5.94862e-31
RARRES2	protein_coding	13835.1	1.6581	0.143348	11.567	6.05913e-31
GIMAP7	protein_coding	2161.51	1.18427	0.102488	11.5553	6.94332e-31
ECSCR	protein_coding	597.658	1.28122	0.11093	11.5499	7.39415e-31
TSPAN18	protein_coding	6694.58	1.32502	0.114726	11.5494	7.4343e-31
GSDMB	protein_coding	414.261	1.87848	0.162758	11.5416	8.14406e-31
FILIP1	protein_coding	1219.83	1.37623	0.119245	11.5412	8.17712e-31
SH3RF3	protein_coding	981.115	1.1568	0.100232	11.5412	8.1757e-31
LBHD1	protein_coding	181.74	1.03552	0.0898303	11.5275	9.58381e-31
SNX10	protein_coding	6418	1.24578	0.108152	11.5188	1.06087e-30
ABCA8	protein_coding	574.336	-1.99661	0.173394	-11.5149	1.10986e-30
NLRP3	protein_coding	370.404	1.33447	0.115926	11.5114	1.15562e-30
IRX3	protein_coding	3845.89	1.51182	0.131379	11.5073	1.21206e-30
LILRB5	protein_coding	397.961	1.71141	0.148747	11.5055	1.23769e-30
C21orf58	protein_coding	149.332	1.27009	0.11044	11.5002	1.31558e-30
GLIPR2	protein_coding	1270.16	1.0461	0.0909681	11.4996	1.32484e-30
FAM212A	protein_coding	282.352	1.34641	0.117136	11.4944	1.40708e-30
CSF1	protein_coding	4291.58	1.01849	0.088671	11.4862	1.54786e-30
GGH	protein_coding	1225.67	-1.43502	0.124956	-11.4842	1.58319e-30
KLRB1	protein_coding	344.389	1.56417	0.136214	11.4831	1.60376e-30
YJEFN3	protein_coding	185.174	2.09902	0.18282	11.4813	1.63793e-30
IDH2	protein_coding	11769.9	-1.08599	0.0946212	-11.4772	1.71735e-30
KLF8	protein_coding	1200.78	1.17717	0.102575	11.4762	1.73676e-30
CAPN5	protein_coding	1979.93	-1.06957	0.0932183	-11.4738	1.78663e-30
TMEM25	protein_coding	1210.64	-1.23057	0.107254	-11.4734	1.7949e-30
GALNT6	protein_coding	537.857	-1.17066	0.102056	-11.4707	1.85125e-30
CAPS	protein_coding	782.201	-1.75961	0.153455	-11.4666	1.94179e-30
AUH	protein_coding	1644.94	-1.134	0.0989498	-11.4604	2.08586e-30
GPRC5B	protein_coding	4668.89	-1.2115	0.105737	-11.4577	2.15223e-30
GRB7	protein_coding	1218.54	-1.2212	0.106669	-11.4485	2.39144e-30
SLC28A1	protein_coding	8007.18	1.88861	0.165005	11.4458	2.46916e-30
HYPK	protein_coding	145.502	1.36616	0.119369	11.4449	2.49463e-30
BLM	protein_coding	146.395	1.23713	0.108138	11.4403	2.62931e-30
TEK	protein_coding	2805.56	-1.44081	0.125965	-11.4382	2.69462e-30
TMEM92	protein_coding	481.968	2.79599	0.244486	11.4362	2.75739e-30
HOXD3	protein_coding	164.086	-1.13026	0.0988531	-11.4337	2.83812e-30
ZNF320	protein_coding	3548.91	1.10839	0.0969894	11.4279	3.0328e-30
SPRY1	protein_coding	6802.95	1.33013	0.116406	11.4266	3.07862e-30
SSPN	protein_coding	2708.51	1.16543	0.102012	11.4245	3.15495e-30
CD38	protein_coding	490.403	1.84714	0.16172	11.4219	3.25095e-30
KCNJ14	protein_coding	97.9103	1.3218	0.115772	11.4173	3.42652e-30
GIPC3	protein_coding	1146.63	1.26847	0.11111	11.4164	3.46302e-30
CFAP221	protein_coding	607.586	-1.4196	0.124387	-11.4128	3.60939e-30
[truncated: 1,075 more rows]
